# Supplementary material for: Mechanistic insight of TiCl4catalyzed formal [3 + 3] cyclization of 1,3-bis(silyl enol ethers) with 1,3-dielectrophiles
Source: Royal Society of Chemistry journal article supplement (doi:10.1039/c5ra19238b), 2015-01-01
Supplement: c5ra19238b1.pdf [file c5ra19238b1.pdf]

## Supplementary Information

### **Mechanistic Insight of TiCl<sub>4</sub> Catalyzed [3+3] Cyclization of 1,3 – bis(silyl enol ethers) with 1,3-dielectrophiles**

Riffat Un Nisa<sup>a</sup>, Maria<sup>a</sup>, Fatima Waseem<sup>a</sup>, Tariq Mahmood<sup>a</sup>, Ralf Ludwig<sup>b,c</sup>, Khurshid Ayub<sup>\*a</sup>

*<sup>a</sup> Department of Chemistry, COMSATS Institute for Information Technology, Campus  
Abbottabad, Abbottabad, Pakistan*

*<sup>b</sup> Leibniz-Institut für Katalyse e. V. an der Universität Rostock, Albert-Einstein-Str. 29a, 18059  
Rostock, Germany*

*<sup>c</sup> Department of Physical Chemistry, University of Rostock, Dr.-Lorenz-Weg 1, 18059 Rostock,  
Germany*

Fax = +92-992-383441 [khurshid@ciit.net.pk](mailto:khurshid@ciit.net.pk)

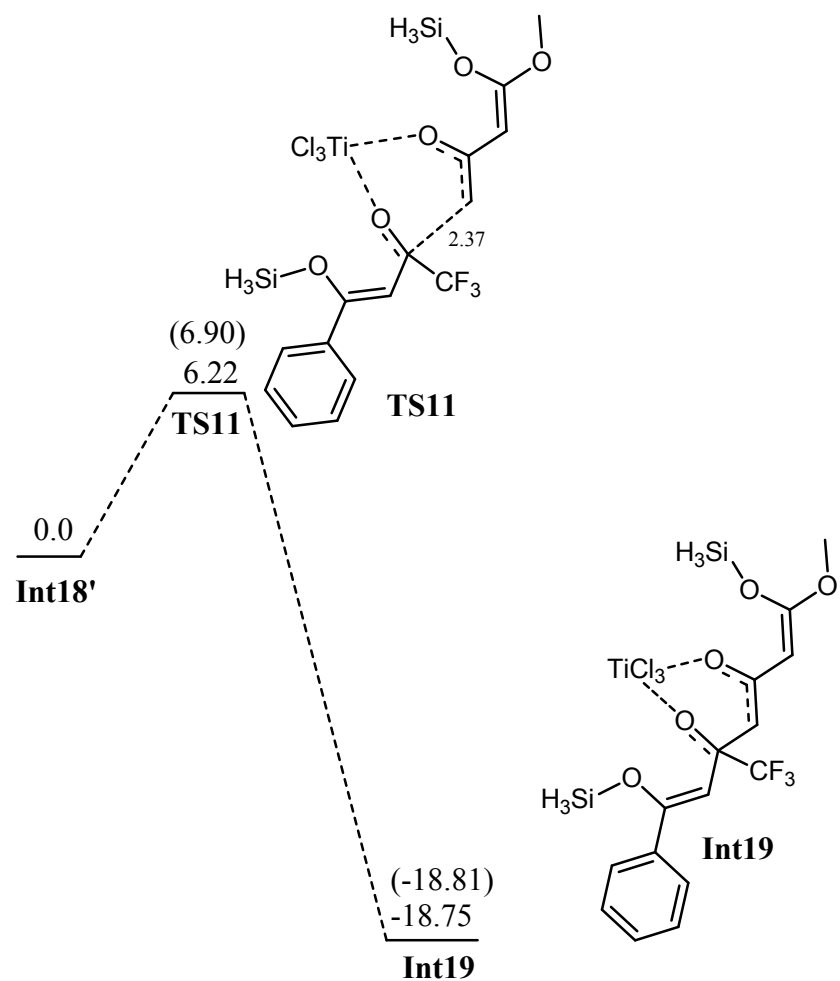

Figure S11. Comparison of Potential energy diagram for 1,2 addition (**Int18'** → **Int19**) for  $\text{SiH}_3$  and  $\text{SiMe}_3$  (values in parenthesis) substituted systems, All energies are relative to **Int18'** at 0 kcal mol<sup>-1</sup>. All bond lengths are in Angstroms.

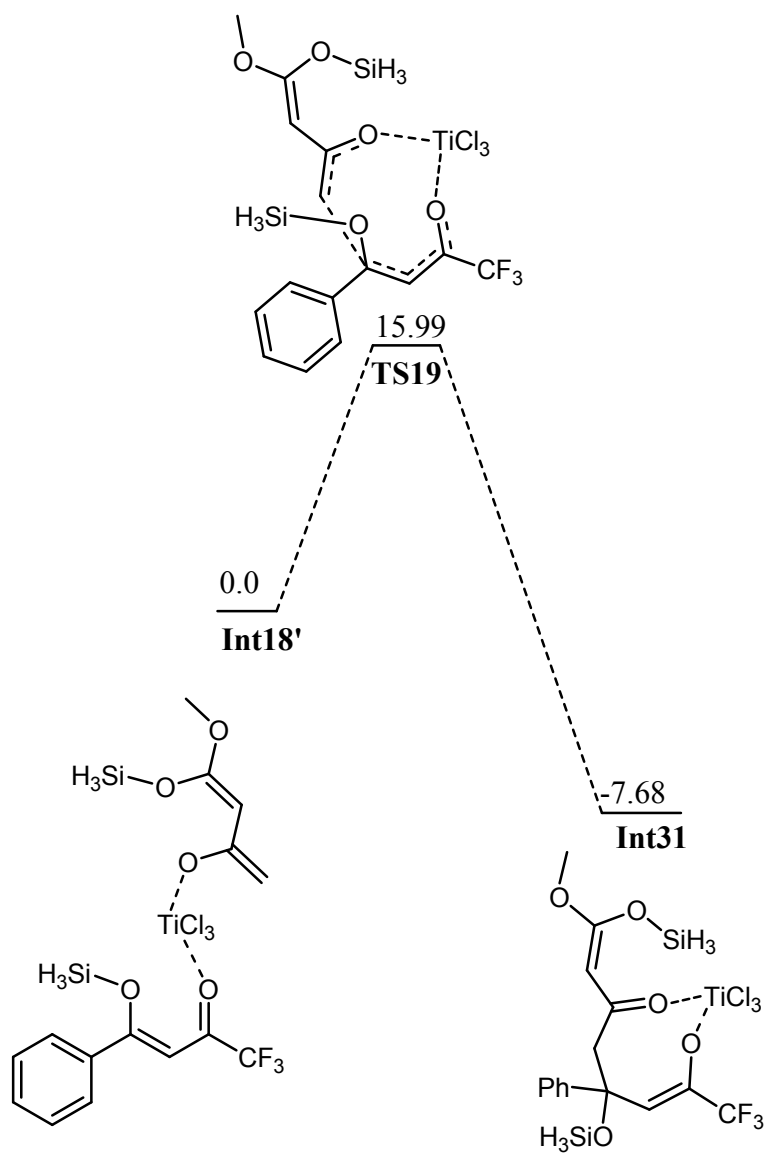

Figure S12. Potential energy diagram for 1,4 addition on **Int18'** (**Int18'** → **Int31**). All energies are relative to **Int18'** at 0 kcal mol<sup>-1</sup>.

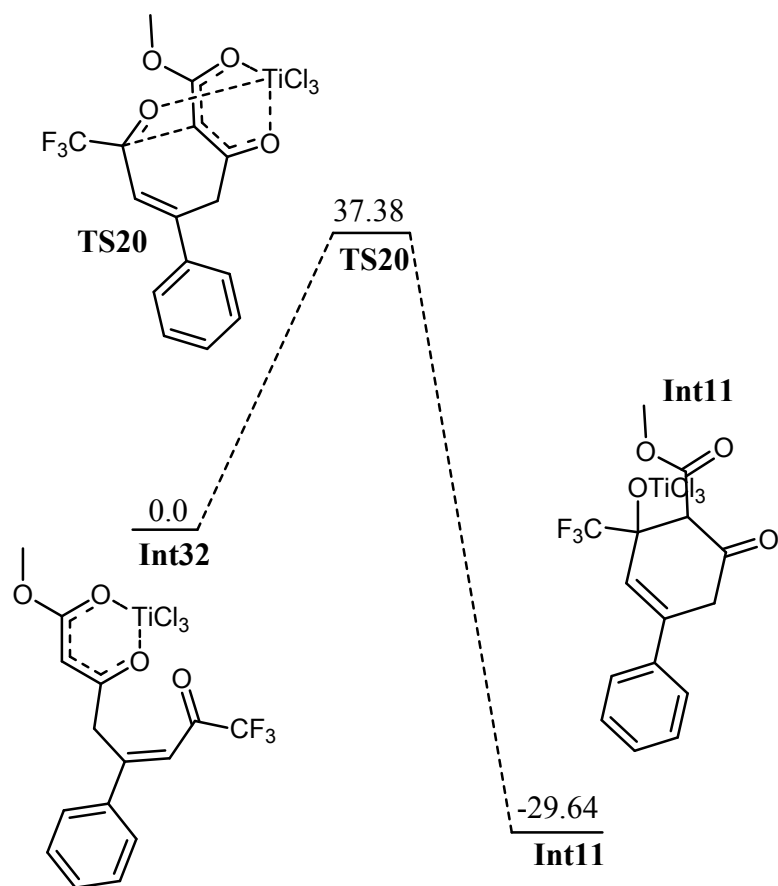

Figure SI2. Potential energy diagram for cyclization in **Int32** (**Int32** → **Int11**), All energies are relative to **Int18'** at 0 kcal mol<sup>-1</sup>.

**Table 1. Total electronic, zero-point corrected and Gibbs free energies of the optimized geometries**

| Structure     | Total Energy  | Zero point corrected energy | Gibbs Free energy |
|---------------|---------------|-----------------------------|-------------------|
| <b>5</b>      | -828.2496239  | -828.056858                 | -828.098358       |
| <b>TS1</b>    | -828.2451912  | -828.052219                 | -828.091633       |
| <b>5'</b>     | -828.2506638  | -828.057436                 | -828.099187       |
| <b>9</b>      | -1125.9582569 | -1125.788366                | -1125.833270      |
| <b>TS2</b>    | -1125.9518805 | -1125.781886                | -1125.825073      |
| <b>9'</b>     | -1125.9597783 | -1125.789795                | -1125.835269      |
| <b>11</b>     | -3518.729896  | -3518.530783                | -3518.587340      |
| <b>11'</b>    | -3518.7389014 | -3518.539342                | -3518.596538      |
| <b>12</b>     | 3816.4460613  | -3816.269505                | -3816.328462      |
| <b>12'</b>    | -3816.4465525 | -3816.270121                | -3816.329787      |
| <b>Int5</b>   | -4818.865185  | -4818.527619                | -4818.606352      |
| <b>TS3</b>    | 4818.8337685  | -4818.496755                | -4818.575059      |
| <b>Int6'</b>  | 4067.3309294  | -4067.021884                | -4067.097096      |
| <b>TS4</b>    | -4067.3226478 | -4067.013451                | -4067.083649      |
| <b>Int7</b>   | 4067.3603386  | -4067.048583                | -4067.120271      |
| <b>Int8</b>   | 4067.3322631  | -4067.022413                | -4067.099301      |
| <b>Int9</b>   | 4161.0133637  | -4160.730803                | -4160.797089      |
| <b>TS5</b>    | 4160.9482175  | 4160.667270                 | -4160.730272      |
| <b>Int10</b>  | 3409.5188122  | -3409.264326                | -3409.324514      |
| <b>Int10'</b> | -3409.4615101 | -3409.20889                 | -3409.269272      |
| <b>TS6</b>    | -3409.4048537 | -3409.153431                | -3409.212319      |
| <b>Int11</b>  | 3409.5193462  | -3409.264762                | -3409.324535      |
| <b>TS7</b>    | -4067.3150455 | -4067.006409                | -4067.074759      |
| <b>Int12</b>  | -4067.3645644 | -4067.052991                | -4067.122094      |
| <b>TS8</b>    | -4067.368496  | -4067.055904                | -4067.121019      |
| <b>Int13</b>  | -4067.3852568 | -4067.074457                | -4067.145110      |
| <b>Int14</b>  | 4161.0206308  | -4160.739589                | -4160.811331      |
| <b>Int15</b>  | -3409.4754867 | -3409.222685                | -3409.283969      |
| <b>TS9</b>    | -3409.4236397 | -3409.172093                | -3409.231363      |
| <b>Int16</b>  | -3409.4784102 | -3409.224999                | -3409.285027      |
| <b>Int17</b>  | 4818.875717   | -4818.540054                | -4818.628437      |
| <b>Ts10</b>   | -4818.8322317 | -4818.495130                | -4818.572310      |
| <b>Int18</b>  | -4818.8640183 | -4818.526476                | -4818.604288      |
| <b>Int18'</b> | 4067.3386567  | -4067.029944                | -4067.103933      |
| <b>TS11</b>   | 4067.3290769  | -4067.020027                | -4067.090122      |
| <b>Int19</b>  | 4067.3719669  | -4067.059823                | -4067.129887      |
| <b>Int20</b>  |               |                             |                   |
| <b>TS12</b>   | 3409.4236398  | -3409.172093                | -3409.239361      |

|                     |               |              |              |
|---------------------|---------------|--------------|--------------|
| <b>Int21</b>        | 3409.5098945  | -3409.255829 | -3409.319405 |
| <b>Int22</b>        | 4521.1596446  | -4520.798943 | -4520.875120 |
| <b>TS13</b>         | -4521.1292691 | -4520.769081 | -4520.845161 |
| <b>Int23</b>        | 3769.6365254  | -3769.304614 | -3769.378818 |
| <b>Int23'</b>       | 3769.6351131  | -3769.303068 | -3769.375638 |
| <b>TS14</b>         | -3769.617516  | -3769.285174 | 3769.353607  |
| <b>Int24</b>        | 3769.6576863  | -3769.322240 | -3769.389072 |
| <b>TS15</b>         | 3769.6271358  | -3769.293876 | -3769.364114 |
| <b>Int25</b>        | 3769.6640305  | 3769.330576  | -3769.405402 |
| <b>Int26</b>        | -3863.3056605 | -3863.001258 | -3863.069575 |
| <b>Int27</b>        | -3863.294042  | -3862.99142  | -3863.062801 |
| <b>TS16</b>         | 3111.7126711  | -3111.438196 | -3111.494015 |
| <b>Int28</b>        | 3111.7700052  | -3111.493247 | -3111.548951 |
| <b>Int27'</b>       | 3111.7981838  | -3111.520346 | -3111.576058 |
| <b>TS17</b>         | 3769.6027339  | -3769.270751 | -3769.337149 |
| <b>Int29</b>        | -3769.6414997 | -3769.306776 | -3769.373618 |
| <b>Int29'</b>       | 3769.6458181  | -3769.309384 | -3769.370686 |
| <b>TS18</b>         | -3769.6334288 | -3769.299038 | -3769.360513 |
| <b>Int30</b>        | -3769.6623314 | -3769.328939 | -3769.396800 |
|                     |               |              |              |
| <b>TS19</b>         | -4067.3128718 | -4067.004459 | -4067.074332 |
| <b>Int31</b>        | -4067.354105  | -4067.042194 | -4067.112140 |
| <b>Int32</b>        | -3409.4707696 | -3409.217524 | -3409.278859 |
| <b>TS20</b>         | -3409.4095081 | -3409.157949 | -3409.324535 |
| <b>Int6'-SiMe3</b>  | -4303.3153672 | -4302.8336   | -4302.922500 |
| <b>TS4-SiMe3</b>    | -4303.3078864 | -4302.825873 | -4302.909038 |
| <b>Int7-SiMe3</b>   | -4303.3454393 | -4302.860993 | -4302.943589 |
| <b>TS7-SiMe3</b>    | -4303.3000695 | -4302.818464 | -4302.900473 |
| <b>Int12-SiMe3</b>  | -4303.3479989 | -4302.863274 | -4302.945167 |
| <b>Int18'-SiMe3</b> | -4303.3227679 | -4302.840770 | -4302.927630 |
| <b>TS11-SiMe3</b>   | -4303.3121996 | -4302.829966 | -4302.912201 |
| <b>Int19-SiMe3</b>  | -4303.3561825 | -4302.870757 | -4302.953343 |
|                     |               |              |              |

### Cartesian Coordinates of the optimized geometries

5

C        -2.35190000    1.11630000    -0.04080000  
C        -0.92610000    1.15030000    -0.18970000  
H        -0.45540000    2.09580000    -0.42600000  
C        -0.13860000    0.04360000    0.02090000

|    |             |             |             |
|----|-------------|-------------|-------------|
| C  | -3.12400000 | 2.41280000  | -0.15960000 |
| H  | -4.18850000 | 2.22330000  | -0.01110000 |
| H  | -2.77430000 | 3.14000000  | 0.58310000  |
| O  | -0.61000000 | -1.17540000 | 0.24880000  |
| O  | -2.97840000 | 0.06270000  | 0.20050000  |
| Si | -2.12750000 | -1.98470000 | -0.00330000 |
| H  | -1.47290000 | -3.33220000 | -0.12300000 |
| H  | -3.01130000 | -2.15560000 | 1.17120000  |
| H  | -2.76290000 | -1.81680000 | -1.33410000 |
| H  | -2.96690000 | 2.85990000  | -1.14890000 |
| C  | 1.34360000  | 0.10250000  | 0.01550000  |
| C  | 2.03980000  | 1.31060000  | 0.19550000  |
| C  | 2.07920000  | -1.08050000 | -0.16950000 |
| C  | 3.43150000  | 1.33590000  | 0.17240000  |
| H  | 1.49540000  | 2.23020000  | 0.38340000  |
| C  | 3.47150000  | -1.05120000 | -0.19620000 |
| H  | 1.54550000  | -2.01550000 | -0.29570000 |
| C  | 4.15230000  | 0.15600000  | -0.02800000 |
| H  | 3.95490000  | 2.27630000  | 0.32100000  |
| H  | 4.02570000  | -1.97330000 | -0.34780000 |
| H  | 5.23860000  | 0.17760000  | -0.04520000 |

## **TS1**

|   |            |            |             |
|---|------------|------------|-------------|
| C | 0.09090000 | 0.01780000 | -0.00810000 |
|---|------------|------------|-------------|

|    |             |             |             |
|----|-------------|-------------|-------------|
| C  | 0.89310000  | 1.14360000  | 0.23270000  |
| H  | 0.45010000  | 2.09420000  | 0.49340000  |
| C  | 2.26420000  | 1.07940000  | -0.01450000 |
| O  | 2.88280000  | -0.01550000 | -0.30360000 |
| O  | 0.60570000  | -1.13670000 | -0.27700000 |
| C  | -1.39120000 | 0.07500000  | -0.00750000 |
| C  | -2.09690000 | 1.29060000  | -0.01160000 |
| C  | -2.11380000 | -1.13070000 | -0.00680000 |
| C  | -3.48920000 | 1.29850000  | -0.00510000 |
| H  | -1.56360000 | 2.23480000  | -0.04240000 |
| C  | -3.50560000 | -1.11950000 | 0.00330000  |
| H  | -1.56530000 | -2.06590000 | -0.00980000 |
| C  | -4.19710000 | 0.09420000  | 0.00570000  |
| H  | -4.02260000 | 2.24480000  | -0.01420000 |
| H  | -4.05220000 | -2.05830000 | 0.01000000  |
| H  | -5.28370000 | 0.10260000  | 0.01220000  |
| Si | 2.34170000  | -1.76580000 | 0.14020000  |
| H  | 3.74320000  | -2.09440000 | -0.28540000 |
| H  | 2.31320000  | -1.63570000 | 1.62350000  |
| H  | 1.71650000  | -3.08340000 | -0.22220000 |
| C  | 3.12590000  | 2.31260000  | -0.00060000 |
| H  | 3.90540000  | 2.20460000  | 0.76230000  |
| H  | 3.63540000  | 2.40760000  | -0.96610000 |
| H  | 2.55020000  | 3.22000000  | 0.19630000  |

5'



|    |             |             |             |
|----|-------------|-------------|-------------|
| C  | -0.00890000 | -0.04920000 | 0.01890000  |
| C  | -0.80480000 | 1.14560000  | -0.08250000 |
| H  | -0.32780000 | 2.10840000  | -0.20200000 |
| C  | -2.17160000 | 1.12860000  | -0.02570000 |
| O  | -2.94290000 | 0.05780000  | 0.09510000  |
| O  | -0.54530000 | -1.17600000 | 0.11930000  |
| C  | 1.48450000  | 0.01970000  | 0.00760000  |
| C  | 2.19960000  | 1.22480000  | 0.09850000  |
| C  | 2.19840000  | -1.18650000 | -0.08820000 |
| C  | 3.59340000  | 1.22250000  | 0.08850000  |
| H  | 1.67790000  | 2.17090000  | 0.19570000  |
| C  | 3.58960000  | -1.18740000 | -0.10390000 |
| H  | 1.63740000  | -2.11250000 | -0.15050000 |
| C  | 4.29150000  | 0.01800000  | -0.01620000 |
| H  | 4.13430000  | 2.16160000  | 0.16510000  |
| H  | 4.12900000  | -2.12720000 | -0.18380000 |
| H  | 5.37810000  | 0.01840000  | -0.02680000 |
| C  | -2.98090000 | 2.39410000  | -0.08530000 |
| H  | -3.67070000 | 2.35310000  | -0.93630000 |
| H  | -3.59520000 | 2.47920000  | 0.81870000  |
| H  | -2.34890000 | 3.28050000  | -0.17510000 |
| Si | -2.75710000 | -1.66290000 | 0.00150000  |
| H  | -2.34930000 | -2.36920000 | 1.23700000  |
| H  | -4.23480000 | -1.91200000 | -0.06110000 |

|          |             |             |             |
|----------|-------------|-------------|-------------|
| H        | -2.26910000 | -2.20800000 | -1.28790000 |
| <b>9</b> |             |             |             |
| C        | -1.82580000 | 0.02180000  | -0.01940000 |
| C        | -0.48900000 | -0.44200000 | 0.18210000  |
| H        | -0.34540000 | -1.47620000 | 0.45990000  |
| C        | 0.61620000  | 0.34710000  | -0.04310000 |
| C        | -2.94500000 | -1.04460000 | 0.05060000  |
| O        | 0.56420000  | 1.64860000  | -0.30750000 |
| O        | -2.16570000 | 1.17340000  | -0.30490000 |
| Si       | -0.48240000 | 2.95590000  | 0.07880000  |
| H        | 0.57290000  | 3.99000000  | 0.29590000  |
| H        | -1.29350000 | 3.43410000  | -1.05580000 |
| H        | -1.17140000 | 2.80080000  | 1.37850000  |
| C        | 1.99490000  | -0.19130000 | -0.02580000 |
| C        | 2.25510000  | -1.56670000 | -0.16460000 |
| C        | 3.07870000  | 0.69090000  | 0.12760000  |
| C        | 3.56130000  | -2.04550000 | -0.13240000 |
| H        | 1.43860000  | -2.26260000 | -0.32670000 |
| C        | 4.38400000  | 0.20760000  | 0.16310000  |
| H        | 2.88440000  | 1.75290000  | 0.22370000  |
| C        | 4.62980000  | -1.16090000 | 0.03560000  |
| H        | 3.74660000  | -3.10950000 | -0.24860000 |
| H        | 5.21090000  | 0.90060000  | 0.29020000  |
| H        | 5.64890000  | -1.53690000 | 0.05990000  |
| F        | -2.66300000 | -2.00240000 | 0.96330000  |

F -4.11990000 -0.49590000 0.37120000

F -3.07120000 -1.65180000 -1.14820000

**TS2**

C 0.09090000 0.01780000 -0.00810000

C 0.89310000 1.14360000 0.23270000

H 0.45010000 2.09420000 0.49340000

C 2.26420000 1.07940000 -0.01450000

O 2.88280000 -0.01550000 -0.30360000

O 0.60570000 -1.13670000 -0.27700000

C -1.39120000 0.07500000 -0.00750000

C -2.09690000 1.29060000 -0.01160000

C -2.11380000 -1.13070000 -0.00680000

C -3.48920000 1.29850000 -0.00510000

H -1.56360000 2.23480000 -0.04240000

C -3.50560000 -1.11950000 0.00330000

H -1.56530000 -2.06590000 -0.00980000

C -4.19710000 0.09420000 0.00570000

H -4.02260000 2.24480000 -0.01420000

H -4.05220000 -2.05830000 0.01000000

H -5.28370000 0.10260000 0.01220000

Si 2.34170000 -1.76580000 0.14020000

H 3.74320000 -2.09440000 -0.28540000

H 2.31320000 -1.63570000 1.62350000

H 1.71650000 -3.08340000 -0.22220000

|   |            |            |             |
|---|------------|------------|-------------|
| C | 3.12590000 | 2.31260000 | -0.00060000 |
| H | 3.90540000 | 2.20460000 | 0.76230000  |
| H | 3.63540000 | 2.40760000 | -0.96610000 |
| H | 2.55020000 | 3.22000000 | 0.19630000  |

**9'**

|    |             |             |             |
|----|-------------|-------------|-------------|
| C  | -0.55380000 | 4.84030000  | -0.53990000 |
| C  | 0.12710000  | 3.62900000  | -0.61030000 |
| C  | -0.37920000 | 2.49170000  | 0.04700000  |
| C  | -1.57250000 | 2.59820000  | 0.78380000  |
| C  | -2.23300000 | 3.81910000  | 0.87470000  |
| C  | -1.72940000 | 4.93940000  | 0.20930000  |
| H  | -0.16860000 | 5.70680000  | -1.06900000 |
| H  | 1.02780000  | 3.56160000  | -1.21220000 |
| H  | -1.95770000 | 1.72840000  | 1.30300000  |
| H  | -3.14460000 | 3.89480000  | 1.45970000  |
| H  | -2.25310000 | 5.88920000  | 0.27210000  |
| C  | 0.31780000  | 1.18590000  | -0.00610000 |
| C  | 1.76630000  | 1.18450000  | -0.12170000 |
| H  | 2.25570000  | 2.13570000  | -0.27050000 |
| O  | -0.32280000 | 0.11370000  | 0.09400000  |
| C  | 2.57860000  | 0.10630000  | 0.03080000  |
| O  | 2.16700000  | -1.10790000 | 0.32660000  |
| Si | 2.80670000  | -2.69420000 | 0.32950000  |
| H  | 4.12810000  | -2.69670000 | 0.99690000  |

|    |             |             |             |
|----|-------------|-------------|-------------|
| H  | 1.82290000  | -3.46490000 | 1.10890000  |
| H  | 2.91960000  | -3.16580000 | -1.06680000 |
| Ti | -1.93630000 | -1.20630000 | -0.08420000 |
| Cl | -2.83910000 | 0.29390000  | -1.47080000 |
| Cl | -3.71580000 | -2.55070000 | -0.09960000 |
| Cl | -1.93680000 | -1.02840000 | 2.16520000  |
| Cl | -0.56840000 | -2.63440000 | -1.11560000 |
| C  | 4.09250000  | 0.28930000  | -0.06100000 |
| F  | 4.66550000  | 0.07220000  | 1.13730000  |
| F  | 4.60680000  | -0.61230000 | -0.92840000 |
| F  | 4.44500000  | 1.51260000  | -0.47950000 |

## 11

|    |             |             |             |
|----|-------------|-------------|-------------|
| C  | 0.10040000  | -1.54020000 | 0.02490000  |
| C  | 1.52950000  | -1.40260000 | -0.00870000 |
| H  | 2.09710000  | -2.32440000 | 0.01190000  |
| C  | 2.24660000  | -0.23310000 | -0.10050000 |
| C  | -0.48140000 | -2.92570000 | 0.12940000  |
| H  | -1.08440000 | -3.12660000 | -0.76350000 |
| H  | 0.28510000  | -3.69610000 | 0.23160000  |
| O  | 1.63920000  | 0.94310000  | -0.26970000 |
| O  | -0.67180000 | -0.54870000 | -0.03440000 |
| Si | 1.58390000  | 2.32060000  | 0.72370000  |
| H  | 2.94610000  | 2.59020000  | 1.25080000  |
| H  | 1.13800000  | 3.41040000  | -0.16360000 |

|    |             |             |             |
|----|-------------|-------------|-------------|
| H  | 0.65520000  | 2.07920000  | 1.84810000  |
| H  | -1.16110000 | -2.96420000 | 0.98790000  |
| C  | 3.72590000  | -0.22560000 | -0.10850000 |
| C  | 4.46730000  | -1.17180000 | 0.62090000  |
| C  | 4.41020000  | 0.73960000  | -0.86870000 |
| C  | 5.85900000  | -1.15330000 | 0.58630000  |
| H  | 3.95280000  | -1.89870000 | 1.24180000  |
| C  | 5.80180000  | 0.74620000  | -0.91020000 |
| H  | 3.84390000  | 1.46150000  | -1.44830000 |
| C  | 6.52920000  | -0.19800000 | -0.18190000 |
| H  | 6.42150000  | -1.87980000 | 1.16550000  |
| H  | 6.31900000  | 1.48690000  | -1.51310000 |
| H  | 7.61510000  | -0.18730000 | -0.20960000 |
| Ti | -2.66830000 | 0.05390000  | -0.05820000 |
| Cl | -4.85570000 | 0.50770000  | -0.03190000 |
| Cl | -2.80580000 | -1.17910000 | -1.93630000 |
| Cl | -1.97390000 | 2.14860000  | -0.32790000 |
| Cl | -2.68060000 | -0.74730000 | 2.05170000  |

## 11'

|   |             |            |             |
|---|-------------|------------|-------------|
| C | -3.53360000 | 3.14820000 | -0.54580000 |
| C | -2.16460000 | 2.89840000 | -0.52280000 |
| C | -1.66280000 | 1.76310000 | 0.13830000  |
| C | -2.55790000 | 0.89260000 | 0.78480000  |
| C | -3.92370000 | 1.15940000 | 0.77740000  |

|    |             |             |             |
|----|-------------|-------------|-------------|
| C  | -4.41450000 | 2.28310000  | 0.10840000  |
| H  | -3.91460000 | 4.01410000  | -1.07940000 |
| H  | -1.49120000 | 3.56000000  | -1.05840000 |
| H  | -2.17720000 | 0.03180000  | 1.32490000  |
| H  | -4.60430000 | 0.48820000  | 1.29230000  |
| H  | -5.48220000 | 2.48350000  | 0.09390000  |
| C  | -0.21310000 | 1.45820000  | 0.15260000  |
| C  | 0.73280000  | 2.53880000  | 0.11720000  |
| H  | 0.33040000  | 3.54250000  | 0.14700000  |
| O  | 0.17220000  | 0.25800000  | 0.22770000  |
| C  | 2.09910000  | 2.42980000  | 0.08980000  |
| O  | 2.69260000  | 1.24250000  | 0.08050000  |
| Si | 4.32880000  | 0.77520000  | 0.06390000  |
| H  | 5.02440000  | 1.39410000  | 1.22010000  |
| H  | 4.30310000  | -0.69180000 | 0.16180000  |
| H  | 4.95410000  | 1.23920000  | -1.19950000 |
| Ti | -0.13180000 | -1.69840000 | -0.07660000 |
| Cl | -0.68830000 | -0.97210000 | -2.17490000 |
| Cl | -1.64270000 | -3.33760000 | -0.16010000 |
| Cl | -0.16120000 | -1.69470000 | 2.22440000  |
| Cl | 1.82970000  | -2.62750000 | -0.46650000 |
| C  | 2.97940000  | 3.64830000  | 0.07200000  |
| H  | 3.63780000  | 3.65750000  | 0.94970000  |
| H  | 3.62000000  | 3.64250000  | -0.81920000 |
| H  | 2.39290000  | 4.56860000  | 0.07020000  |

12'

|    |             |             |             |
|----|-------------|-------------|-------------|
| C  | -0.55380000 | 4.84030000  | -0.53990000 |
| C  | 0.12710000  | 3.62900000  | -0.61030000 |
| C  | -0.37920000 | 2.49170000  | 0.04700000  |
| C  | -1.57250000 | 2.59820000  | 0.78380000  |
| C  | -2.23300000 | 3.81910000  | 0.87470000  |
| C  | -1.72940000 | 4.93940000  | 0.20930000  |
| H  | -0.16860000 | 5.70680000  | -1.06900000 |
| H  | 1.02780000  | 3.56160000  | -1.21220000 |
| H  | -1.95770000 | 1.72840000  | 1.30300000  |
| H  | -3.14460000 | 3.89480000  | 1.45970000  |
| H  | -2.25310000 | 5.88920000  | 0.27210000  |
| C  | 0.31780000  | 1.18590000  | -0.00610000 |
| C  | 1.76630000  | 1.18450000  | -0.12170000 |
| H  | 2.25570000  | 2.13570000  | -0.27050000 |
| O  | -0.32280000 | 0.11370000  | 0.09400000  |
| C  | 2.57860000  | 0.10630000  | 0.03080000  |
| O  | 2.16700000  | -1.10790000 | 0.32660000  |
| Si | 2.80670000  | -2.69420000 | 0.32950000  |
| H  | 4.12810000  | -2.69670000 | 0.99700000  |
| H  | 1.82290000  | -3.46490000 | 1.10890000  |
| H  | 2.91960000  | -3.16580000 | -1.06680000 |
| Ti | -1.93630000 | -1.20630000 | -0.08420000 |



|    |             |             |             |
|----|-------------|-------------|-------------|
| Cl | -2.83910000 | 0.29390000  | -1.47080000 |
| Cl | -3.71580000 | -2.55070000 | -0.09960000 |
| Cl | -1.93680000 | -1.02840000 | 2.16520000  |
| Cl | -0.56830000 | -2.63440000 | -1.11560000 |
| C  | 4.09250000  | 0.28930000  | -0.06100000 |
| F  | 4.66550000  | 0.07220000  | 1.13730000  |
| F  | 4.44500000  | 1.51260000  | -0.47950000 |
| F  | 4.60680000  | -0.61230000 | -0.92840000 |

## 12

|   |             |             |             |
|---|-------------|-------------|-------------|
| C | -0.77470000 | 0.45850000  | 0.03040000  |
| C | 0.30600000  | -0.51700000 | -0.07010000 |
| H | 0.08780000  | -1.56400000 | -0.21600000 |
| C | 1.61160000  | -0.17500000 | 0.04240000  |
| O | 2.16640000  | 1.01130000  | 0.22300000  |
| O | -0.52110000 | 1.66830000  | 0.14340000  |
| C | -2.19890000 | 0.00880000  | 0.00810000  |
| C | -2.58390000 | -1.34180000 | 0.00090000  |
| C | -3.19530000 | 1.00020000  | 0.00440000  |
| C | -3.93350000 | -1.69040000 | -0.01190000 |
| H | -1.84090000 | -2.13180000 | 0.01650000  |
| C | -4.54120000 | 0.65090000  | -0.01210000 |
| H | -2.88590000 | 2.03960000  | 0.01450000  |
| C | -4.91370000 | -0.69660000 | -0.02040000 |

|    |             |             |             |
|----|-------------|-------------|-------------|
| H  | -4.21910000 | -2.73850000 | -0.01370000 |
| H  | -5.30180000 | 1.42650000  | -0.01780000 |
| H  | -5.96510000 | -0.97100000 | -0.03220000 |
| C  | 2.69620000  | -1.24660000 | -0.00430000 |
| Si | 1.74880000  | 2.64750000  | -0.09950000 |
| H  | 1.12330000  | 3.36030000  | 1.03130000  |
| H  | 3.13750000  | 3.17830000  | -0.20460000 |
| H  | 1.12720000  | 2.84700000  | -1.42660000 |
| F  | 3.38820000  | -1.26610000 | 1.14890000  |
| F  | 3.56300000  | -0.99350000 | -1.00190000 |
| F  | 2.18820000  | -2.47970000 | -0.20190000 |

### **Int5**

|    |             |             |             |
|----|-------------|-------------|-------------|
| C  | 3.35320000  | 0.68160000  | 0.48730000  |
| C  | 2.08820000  | 0.27870000  | 0.71150000  |
| H  | 1.92330000  | -0.46470000 | 1.48280000  |
| C  | 0.90710000  | 0.59460000  | -0.10400000 |
| Cl | -0.31520000 | -2.10500000 | 1.97690000  |
| Cl | 1.95920000  | -2.87790000 | -0.43690000 |
| C  | -2.92950000 | -0.43770000 | -0.42000000 |
| C  | -2.82950000 | 0.38310000  | 0.77900000  |
| H  | -2.36520000 | -0.10290000 | 1.62590000  |
| C  | -3.24690000 | 1.66050000  | 0.92510000  |
| O  | -3.81470000 | 2.37690000  | -0.05970000 |
| Si | -4.43640000 | 3.94480000  | 0.12800000  |

|    |             |             |             |
|----|-------------|-------------|-------------|
| Cl | -0.53080000 | -2.10080000 | -2.56830000 |
| H  | -4.94150000 | 4.25600000  | -1.22860000 |
| H  | -5.55050000 | 3.97470000  | 1.10590000  |
| H  | -3.38570000 | 4.91850000  | 0.50920000  |
| O  | -3.16270000 | 2.39780000  | 2.06010000  |
| C  | -3.37200000 | -0.14340000 | -1.65040000 |
| H  | -3.72280000 | 0.85210000  | -1.88580000 |
| H  | -3.36850000 | -0.89680000 | -2.42830000 |
| C  | -2.63070000 | 1.79250000  | 3.23890000  |
| H  | -3.22660000 | 0.92010000  | 3.52810000  |
| H  | -1.58940000 | 1.49000000  | 3.08360000  |
| H  | -2.68580000 | 2.55720000  | 4.01410000  |
| O  | 3.72170000  | 1.52870000  | -0.48150000 |
| Si | 5.06110000  | 1.61540000  | -1.52520000 |
| H  | 4.70280000  | 2.73230000  | -2.42480000 |
| H  | 6.29800000  | 1.93390000  | -0.77680000 |
| H  | 5.19890000  | 0.34500000  | -2.27180000 |
| C  | 0.60850000  | 1.94980000  | -0.59850000 |
| C  | 1.18240000  | 3.09260000  | -0.01310000 |
| C  | -0.31430000 | 2.09500000  | -1.65150000 |
| C  | 0.84380000  | 4.35900000  | -0.47830000 |
| H  | 1.87420000  | 2.98620000  | 0.81520000  |
| C  | -0.63400000 | 3.36380000  | -2.12410000 |
| H  | -0.76340000 | 1.20820000  | -2.08530000 |
| C  | -0.05780000 | 4.49550000  | -1.53830000 |

|    |             |             |             |
|----|-------------|-------------|-------------|
| H  | 1.28020000  | 5.23970000  | -0.01640000 |
| H  | -1.33280000 | 3.47200000  | -2.94840000 |
| H  | -0.31270000 | 5.48560000  | -1.90670000 |
| C  | 4.48630000  | 0.19580000  | 1.37700000  |
| F  | 4.08290000  | -0.65890000 | 2.32050000  |
| F  | 5.07900000  | 1.24810000  | 1.98050000  |
| F  | 5.43330000  | -0.41720000 | 0.62610000  |
| O  | 0.09060000  | -0.31980000 | -0.35440000 |
| Cl | -0.97540000 | -4.53190000 | -0.28950000 |
| Si | -3.75970000 | -2.86380000 | 0.27410000  |
| O  | -2.50220000 | -1.77270000 | -0.16510000 |
| Ti | -0.22160000 | -2.41800000 | -0.32950000 |
| H  | -4.92010000 | -2.01920000 | 0.64650000  |
| H  | -4.10870000 | -3.71580000 | -0.88420000 |
| H  | -3.32910000 | -3.66470000 | 1.43580000  |

### **TS3**

|    |             |             |             |
|----|-------------|-------------|-------------|
| C  | -3.64870000 | 0.36610000  | -0.46520000 |
| C  | -2.35570000 | 0.09920000  | -0.73840000 |
| H  | -2.14480000 | -0.71740000 | -1.41870000 |
| C  | -1.18140000 | 0.65830000  | -0.06460000 |
| Cl | 0.75210000  | -1.65340000 | -2.04670000 |
| Cl | -1.39280000 | -3.24580000 | -0.10540000 |
| C  | 2.90820000  | -0.30940000 | 0.71830000  |
| C  | 3.26350000  | 0.32740000  | -0.54370000 |

|    |             |             |             |
|----|-------------|-------------|-------------|
| H  | 3.17300000  | -0.30310000 | -1.41620000 |
| C  | 3.65140000  | 1.60870000  | -0.72590000 |
| O  | 3.77230000  | 2.50310000  | 0.27300000  |
| Si | 4.24950000  | 4.11580000  | 0.05380000  |
| Cl | 0.08590000  | -1.86700000 | 2.48960000  |
| H  | 4.19250000  | 4.65670000  | 1.43210000  |
| H  | 5.63190000  | 4.21690000  | -0.47140000 |
| H  | 3.30640000  | 4.86170000  | -0.81380000 |
| O  | 3.96930000  | 2.18260000  | -1.91280000 |
| C  | 3.00300000  | 0.15180000  | 1.97710000  |
| H  | 3.39830000  | 1.13910000  | 2.17480000  |
| H  | 2.69620000  | -0.46900000 | 2.80920000  |
| C  | 3.89000000  | 1.39520000  | -3.10270000 |
| H  | 4.58350000  | 0.54880000  | -3.05090000 |
| H  | 2.87010000  | 1.02700000  | -3.25570000 |
| H  | 4.17570000  | 2.06220000  | -3.91650000 |
| O  | -4.06650000 | 1.28350000  | 0.41130000  |
| Si | -5.38080000 | 1.38950000  | 1.48900000  |
| H  | -5.12600000 | 2.66920000  | 2.18310000  |
| H  | -6.66450000 | 1.44440000  | 0.75500000  |
| H  | -5.34550000 | 0.24860000  | 2.43030000  |
| C  | -1.01700000 | 2.07860000  | 0.26960000  |
| C  | -1.78120000 | 3.07630000  | -0.36300000 |
| C  | -0.02540000 | 2.44360000  | 1.20140000  |
| C  | -1.56510000 | 4.41590000  | -0.05870000 |

|    |             |             |             |
|----|-------------|-------------|-------------|
| H  | -2.52210000 | 2.80160000  | -1.10520000 |
| C  | 0.17150000  | 3.78430000  | 1.51370000  |
| H  | 0.57460000  | 1.66930000  | 1.66830000  |
| C  | -0.59600000 | 4.77030000  | 0.88480000  |
| H  | -2.14780000 | 5.18460000  | -0.55740000 |
| H  | 0.92390000  | 4.06220000  | 2.24570000  |
| H  | -0.43560000 | 5.81740000  | 1.12690000  |
| C  | -4.75660000 | -0.38470000 | -1.18980000 |
| F  | -4.29750000 | -1.30690000 | -2.03760000 |
| F  | -5.52420000 | 0.48600000  | -1.87830000 |
| F  | -5.55980000 | -0.99760000 | -0.28680000 |
| O  | -0.23680000 | -0.12330000 | 0.20780000  |
| Cl | 1.71610000  | -4.14720000 | 0.27660000  |
| Si | 3.78400000  | -3.04920000 | 0.46390000  |
| H  | 4.50290000  | -2.28020000 | 1.51620000  |
| H  | 4.29940000  | -4.42780000 | 0.73410000  |
| H  | 4.21600000  | -2.73300000 | -0.91680000 |
| O  | 2.44110000  | -1.62920000 | 0.53600000  |
| Ti | 0.48160000  | -2.02710000 | 0.23350000  |

### **Int6**

|   |            |             |             |
|---|------------|-------------|-------------|
| C | 3.81890000 | -0.33990000 | -0.30660000 |
| C | 2.82200000 | -0.28400000 | 0.59450000  |
| H | 2.65430000 | -1.15350000 | 1.21950000  |
| C | 1.79280000 | 0.76460000  | 0.70250000  |

|    |             |             |             |
|----|-------------|-------------|-------------|
| Cl | 0.40770000  | -1.86150000 | 2.75190000  |
| Cl | -1.89150000 | -3.26860000 | 0.75380000  |
| C  | -3.21800000 | 0.41840000  | 0.82660000  |
| C  | -4.09630000 | -0.28600000 | -0.10090000 |
| H  | -3.75680000 | -1.26850000 | -0.39780000 |
| C  | -5.26880000 | 0.16410000  | -0.59800000 |
| O  | -5.79670000 | 1.36140000  | -0.29110000 |
| Si | -7.23670000 | 1.97430000  | -0.94770000 |
| Cl | 0.09300000  | -1.55340000 | -1.28920000 |
| H  | -7.34570000 | 3.30280000  | -0.30290000 |
| H  | -7.14280000 | 2.13240000  | -2.41920000 |
| H  | -8.40640000 | 1.13850000  | -0.58690000 |
| O  | -6.07180000 | -0.50240000 | -1.46210000 |
| C  | -3.39820000 | 1.56310000  | 1.51050000  |
| H  | -4.32060000 | 2.11900000  | 1.42310000  |
| H  | -2.61710000 | 1.93250000  | 2.16440000  |
| C  | -5.66790000 | -1.79290000 | -1.92480000 |
| H  | -4.71260000 | -1.73010000 | -2.45710000 |
| H  | -5.57870000 | -2.49330000 | -1.08770000 |
| H  | -6.45440000 | -2.12100000 | -2.60470000 |
| O  | 4.10270000  | 0.63110000  | -1.18540000 |
| Si | 4.60970000  | 0.63810000  | -2.80660000 |
| H  | 4.57890000  | 2.07490000  | -3.15380000 |
| H  | 5.98630000  | 0.10850000  | -2.93610000 |
| H  | 3.66100000  | -0.13500000 | -3.63890000 |

|    |             |             |             |
|----|-------------|-------------|-------------|
| C  | 2.10890000  | 2.20630000  | 0.68220000  |
| C  | 3.40470000  | 2.68230000  | 0.94460000  |
| C  | 1.06560000  | 3.12290000  | 0.45420000  |
| C  | 3.65320000  | 4.05170000  | 0.97120000  |
| H  | 4.20690000  | 1.98160000  | 1.14780000  |
| C  | 1.32270000  | 4.48900000  | 0.46620000  |
| H  | 0.06610000  | 2.74540000  | 0.26600000  |
| C  | 2.61570000  | 4.95480000  | 0.72610000  |
| H  | 4.65370000  | 4.41530000  | 1.18610000  |
| H  | 0.51740000  | 5.19290000  | 0.27790000  |
| H  | 2.81340000  | 6.02320000  | 0.74190000  |
| C  | 4.73890000  | -1.54790000 | -0.36780000 |
| F  | 4.41610000  | -2.49730000 | 0.51580000  |
| F  | 6.01420000  | -1.17000000 | -0.14050000 |
| F  | 4.70200000  | -2.09560000 | -1.60730000 |
| O  | 0.60450000  | 0.41930000  | 0.85810000  |
| O  | -2.01620000 | -0.23240000 | 0.99780000  |
| Ti | -0.69640000 | -1.35310000 | 0.83210000  |

### **Int6'**

|    |            |             |             |
|----|------------|-------------|-------------|
| C  | 1.48170000 | 1.10220000  | -0.69300000 |
| O  | 1.31750000 | 0.37200000  | 0.31020000  |
| Ti | 1.44160000 | -1.48620000 | 1.20350000  |
| Cl | 0.17010000 | -1.82830000 | 3.02000000  |



|    |             |             |             |
|----|-------------|-------------|-------------|
| Cl | 3.15790000  | -0.37920000 | 2.31730000  |
| O  | 0.18380000  | -1.85520000 | -0.00580000 |
| C  | -0.89110000 | -1.68580000 | -0.82360000 |
| C  | -2.14950000 | -1.80860000 | -0.08880000 |
| H  | -2.03510000 | -2.02380000 | 0.96490000  |
| C  | -3.39940000 | -1.68850000 | -0.58380000 |
| O  | -3.67160000 | -1.41250000 | -1.87250000 |
| Si | -5.23560000 | -1.30820000 | -2.52000000 |
| Cl | 2.69210000  | -3.30000000 | 0.78460000  |
| H  | -4.97480000 | -1.01480000 | -3.94810000 |
| H  | -5.97480000 | -2.58680000 | -2.39180000 |
| H  | -6.00940000 | -0.19690000 | -1.91470000 |
| O  | -4.55020000 | -1.81820000 | 0.12340000  |
| C  | -0.67770000 | -1.45760000 | -2.13690000 |
| H  | -1.50480000 | -1.33440000 | -2.82150000 |
| H  | 0.33400000  | -1.43370000 | -2.52380000 |
| C  | -4.47250000 | -2.13870000 | 1.51310000  |
| H  | -3.94050000 | -1.35420000 | 2.06230000  |
| H  | -5.50450000 | -2.20310000 | 1.85910000  |
| H  | -3.96600000 | -3.09860000 | 1.66050000  |
| C  | 2.41590000  | 0.70740000  | -1.77340000 |
| C  | 2.22340000  | 1.13360000  | -3.10060000 |
| C  | 3.51070000  | -0.11940000 | -1.46610000 |
| C  | 3.09920000  | 0.72390000  | -4.10110000 |
| H  | 1.36660000  | 1.74840000  | -3.35860000 |

|    |             |             |             |
|----|-------------|-------------|-------------|
| C  | 4.39500000  | -0.50870000 | -2.46860000 |
| H  | 3.68890000  | -0.41960000 | -0.43870000 |
| C  | 4.18860000  | -0.09370000 | -3.78600000 |
| H  | 2.93150000  | 1.03870000  | -5.12690000 |
| H  | 5.24450000  | -1.13670000 | -2.21850000 |
| H  | 4.87520000  | -0.40630000 | -4.56780000 |
| C  | 0.83140000  | 2.39980000  | -0.78840000 |
| C  | -0.06980000 | 2.95700000  | 0.06100000  |
| H  | 1.13940000  | 3.04150000  | -1.60510000 |
| C  | -0.67060000 | 2.26540000  | 1.29480000  |
| F  | -1.65450000 | 3.04660000  | 1.81460000  |
| F  | 0.24120000  | 2.08570000  | 2.25250000  |
| F  | -1.23180000 | 1.09280000  | 0.98120000  |
| O  | -0.47970000 | 4.19810000  | -0.19080000 |
| Si | -1.36800000 | 5.42900000  | 0.58260000  |
| H  | -2.81600000 | 5.12880000  | 0.56230000  |
| H  | -0.86450000 | 5.65780000  | 1.95430000  |
| H  | -1.08100000 | 6.59820000  | -0.27630000 |

#### TS4

|   |            |            |            |
|---|------------|------------|------------|
| C | 0.61290000 | 1.20620000 | 0.08380000 |
| O | 1.21450000 | 0.10940000 | 0.41680000 |

|    |             |             |             |
|----|-------------|-------------|-------------|
| Ti | 2.24560000  | -1.41430000 | -0.18640000 |
| Cl | 1.59690000  | -3.51480000 | 0.24980000  |
| Cl | 3.45310000  | -1.15300000 | 1.74200000  |
| O  | 1.04520000  | -1.21940000 | -1.64880000 |
| C  | -0.06060000 | -0.54970000 | -1.89250000 |
| C  | -1.27230000 | -1.30850000 | -1.72120000 |
| H  | -1.11610000 | -2.32920000 | -1.40030000 |
| C  | -2.55450000 | -0.87520000 | -1.88330000 |
| O  | -2.88070000 | 0.34760000  | -2.30390000 |
| Si | -4.48340000 | 0.91550000  | -2.47610000 |
| Cl | 4.02650000  | -1.37460000 | -1.53540000 |
| H  | -4.27200000 | 2.31730000  | -2.89830000 |
| H  | -5.19800000 | 0.15680000  | -3.52790000 |
| H  | -5.21460000 | 0.86340000  | -1.19040000 |
| O  | -3.65180000 | -1.61340000 | -1.64460000 |
| C  | 0.07160000  | 0.82030000  | -2.11030000 |
| H  | -0.79270000 | 1.42690000  | -2.34320000 |
| H  | 1.03980000  | 1.17510000  | -2.43900000 |
| C  | -3.51390000 | -2.91480000 | -1.05210000 |
| H  | -2.96550000 | -2.84100000 | -0.10870000 |
| H  | -4.53190000 | -3.26160000 | -0.87690000 |
| H  | -2.99920000 | -3.59530000 | -1.73720000 |
| C  | 1.46510000  | 2.41680000  | -0.16980000 |
| C  | 0.94140000  | 3.61840000  | -0.67960000 |
| C  | 2.82920000  | 2.35690000  | 0.15430000  |

|    |             |             |             |
|----|-------------|-------------|-------------|
| C  | 1.76350000  | 4.72480000  | -0.86750000 |
| H  | -0.10510000 | 3.68960000  | -0.96040000 |
| C  | 3.64830000  | 3.47060000  | -0.03150000 |
| H  | 3.24160000  | 1.44850000  | 0.57860000  |
| C  | 3.12170000  | 4.65570000  | -0.54380000 |
| H  | 1.34440000  | 5.64230000  | -1.27130000 |
| H  | 4.70010000  | 3.40700000  | 0.23170000  |
| H  | 3.76170000  | 5.52130000  | -0.69040000 |
| C  | -0.75790000 | 1.44470000  | 0.56260000  |
| C  | -1.52820000 | 0.73080000  | 1.40760000  |
| H  | -1.24090000 | 2.33000000  | 0.16640000  |
| C  | -1.11060000 | -0.51160000 | 2.19150000  |
| F  | -2.04380000 | -0.78460000 | 3.14080000  |
| F  | 0.05650000  | -0.35560000 | 2.82020000  |
| F  | -1.03100000 | -1.60800000 | 1.40700000  |
| O  | -2.82220000 | 1.11070000  | 1.57220000  |
| Si | -3.75000000 | 1.40350000  | 2.95580000  |
| H  | -4.58110000 | 0.22910000  | 3.30510000  |
| H  | -2.88110000 | 1.80560000  | 4.08750000  |
| H  | -4.63700000 | 2.52480000  | 2.56400000  |

### **Int7**

|   |            |             |             |
|---|------------|-------------|-------------|
| C | 0.17500000 | 0.33120000  | -0.73630000 |
| O | 1.09260000 | -0.71360000 | -0.44340000 |

|    |             |             |             |
|----|-------------|-------------|-------------|
| Ti | 1.16640000  | -2.37380000 | 0.17180000  |
| Cl | 1.47910000  | -2.62370000 | 2.37950000  |
| Cl | 3.27090000  | -2.83440000 | -0.48720000 |
| O  | -0.87680000 | -1.94990000 | 0.74580000  |
| C  | -1.68190000 | -1.13080000 | 0.23920000  |
| C  | -2.98790000 | -1.06060000 | 0.83240000  |
| H  | -3.11620000 | -1.74200000 | 1.66320000  |
| C  | -4.05840000 | -0.28250000 | 0.47930000  |
| O  | -4.05780000 | 0.59730000  | -0.51520000 |
| Si | -5.41090000 | 1.53580000  | -1.00300000 |
| Cl | 0.16960000  | -3.96570000 | -1.09070000 |
| H  | -4.86020000 | 2.30240000  | -2.13900000 |
| H  | -6.51570000 | 0.65250000  | -1.43670000 |
| H  | -5.83280000 | 2.43660000  | 0.09260000  |
| O  | -5.24780000 | -0.30930000 | 1.09420000  |
| C  | -1.22900000 | -0.31250000 | -0.95210000 |
| H  | -1.95030000 | 0.45910000  | -1.21260000 |
| H  | -1.14830000 | -0.99820000 | -1.80500000 |
| C  | -5.47940000 | -1.19790000 | 2.20030000  |
| H  | -4.80170000 | -0.96280000 | 3.02580000  |
| H  | -6.51180000 | -1.01890000 | 2.49830000  |
| H  | -5.35130000 | -2.23780000 | 1.88660000  |
| C  | 0.58190000  | 1.00940000  | -2.05600000 |
| C  | 0.01780000  | 2.24090000  | -2.41210000 |
| C  | 1.46000000  | 0.37980000  | -2.94360000 |

|    |             |             |             |
|----|-------------|-------------|-------------|
| C  | 0.32470000  | 2.83350000  | -3.63690000 |
| H  | -0.65390000 | 2.74900000  | -1.72460000 |
| C  | 1.76960000  | 0.97720000  | -4.16690000 |
| H  | 1.91730000  | -0.56360000 | -2.66790000 |
| C  | 1.20250000  | 2.20200000  | -4.51980000 |
| H  | -0.11730000 | 3.79180000  | -3.89670000 |
| H  | 2.46180000  | 0.48130000  | -4.84190000 |
| H  | 1.44690000  | 2.66460000  | -5.47210000 |
| C  | 0.08930000  | 1.29860000  | 0.44000000  |
| C  | 1.06270000  | 1.87600000  | 1.15750000  |
| H  | -0.91310000 | 1.52740000  | 0.79400000  |
| C  | 2.55820000  | 1.73770000  | 0.94540000  |
| F  | 3.14320000  | 2.96080000  | 1.10600000  |
| F  | 2.89450000  | 1.29930000  | -0.26810000 |
| F  | 3.10300000  | 0.92310000  | 1.86690000  |
| O  | 0.72370000  | 2.60420000  | 2.25270000  |
| Si | 1.40070000  | 3.90400000  | 3.08420000  |
| H  | 2.66310000  | 3.54560000  | 3.77010000  |
| H  | 1.60090000  | 5.07180000  | 2.19050000  |
| H  | 0.36130000  | 4.22250000  | 4.09120000  |

### **Int8**

|   |             |             |             |
|---|-------------|-------------|-------------|
| C | -1.44700000 | -2.42850000 | -0.30810000 |
| C | -1.36390000 | -1.82610000 | 0.91600000  |
| H | -2.11230000 | -2.13880000 | 1.63150000  |

|    |             |             |             |
|----|-------------|-------------|-------------|
| C  | -0.46460000 | -0.79030000 | 1.30980000  |
| O  | -1.18470000 | 0.68340000  | -0.78920000 |
| Ti | -1.07700000 | 2.29020000  | -1.03220000 |
| O  | 1.55500000  | -2.15280000 | 2.54180000  |
| C  | 1.93190000  | -1.49450000 | 1.57610000  |
| C  | 3.34250000  | -1.43030000 | 1.22190000  |
| H  | 3.97550000  | -1.98700000 | 1.90080000  |
| C  | 3.92250000  | -0.77190000 | 0.17800000  |
| O  | 3.23840000  | -0.10880000 | -0.74800000 |
| Si | 3.89560000  | 0.92840000  | -1.94590000 |
| H  | 2.69940000  | 1.42620000  | -2.64580000 |
| H  | 4.66570000  | 2.01700000  | -1.30330000 |
| H  | 4.75910000  | 0.14820000  | -2.86460000 |
| O  | 5.24630000  | -0.71310000 | -0.05920000 |
| C  | 0.90890000  | -0.70060000 | 0.72390000  |
| C  | 6.15980000  | -1.32770000 | 0.85520000  |
| H  | 6.00410000  | -2.41080000 | 0.88570000  |
| H  | 7.15340000  | -1.10510000 | 0.46670000  |
| H  | 6.04360000  | -0.90430000 | 1.85790000  |
| O  | -0.69570000 | -2.17250000 | -1.35140000 |
| Si | -1.00590000 | -1.48840000 | -2.91080000 |
| H  | 0.91670000  | -1.10980000 | -0.28430000 |
| H  | 1.22250000  | 0.34190000  | 0.63260000  |
| Cl | -2.89010000 | 3.28730000  | -0.09730000 |
| Cl | 0.84760000  | 2.99650000  | 0.00580000  |

|    |             |             |             |
|----|-------------|-------------|-------------|
| Cl | -0.94580000 | 2.64800000  | -3.27120000 |
| H  | 0.17190000  | -0.64960000 | -3.18500000 |
| H  | -2.29810000 | -0.78700000 | -2.91210000 |
| H  | -1.03260000 | -2.64550000 | -3.83980000 |
| C  | -0.84120000 | 0.08090000  | 2.39590000  |
| C  | 0.13300000  | 0.84540000  | 3.08630000  |
| C  | -2.20210000 | 0.23400000  | 2.76910000  |
| C  | -0.23530000 | 1.69420000  | 4.11920000  |
| H  | 1.17900000  | 0.75620000  | 2.82430000  |
| C  | -2.56590000 | 1.10180000  | 3.78560000  |
| H  | -2.97600000 | -0.28660000 | 2.21700000  |
| C  | -1.58280000 | 1.82790000  | 4.46830000  |
| H  | 0.52370000  | 2.26380000  | 4.64580000  |
| H  | -3.61340000 | 1.22960000  | 4.03890000  |
| H  | -1.86990000 | 2.50870000  | 5.26470000  |
| C  | -2.49120000 | -3.52070000 | -0.55120000 |
| F  | -3.29820000 | -3.71570000 | 0.50260000  |
| F  | -3.25790000 | -3.19330000 | -1.61280000 |
| F  | -1.87450000 | -4.68020000 | -0.83340000 |

### **Int9**

|   |             |            |            |
|---|-------------|------------|------------|
| C | 1.18340000  | 2.39280000 | 0.15820000 |
| C | 0.07130000  | 1.34420000 | 0.02050000 |
| C | -1.26280000 | 2.01310000 | 0.19070000 |



|    |             |             |             |
|----|-------------|-------------|-------------|
| C  | 2.60540000  | 1.86410000  | 0.14610000  |
| O  | -1.76890000 | 2.04300000  | 1.36530000  |
| O  | 0.92180000  | 3.57820000  | 0.19670000  |
| C  | 2.75090000  | 0.35720000  | 0.09020000  |
| C  | 1.72180000  | -0.45650000 | 0.37480000  |
| C  | 0.34840000  | 0.02240000  | 0.80720000  |
| O  | -0.62320000 | -0.91870000 | 0.50060000  |
| C  | -3.09240000 | 2.62410000  | 1.59330000  |
| Cl | -2.82730000 | -2.79620000 | 1.37850000  |
| H  | 0.09720000  | 0.99490000  | -1.02350000 |
| H  | -3.24070000 | 2.52760000  | 2.66600000  |
| H  | -3.08430000 | 3.66800000  | 1.27880000  |
| H  | -3.82030000 | 2.03510000  | 1.03370000  |
| H  | 3.10390000  | 2.26550000  | 1.03940000  |
| H  | 3.10800000  | 2.34740000  | -0.70050000 |
| H  | 1.82390000  | -1.53530000 | 0.32680000  |
| Cl | -1.25060000 | -0.41890000 | -2.41430000 |
| Cl | -1.51930000 | -3.54580000 | -1.53350000 |
| Cl | -3.85650000 | -0.33330000 | -0.48810000 |
| Ti | -1.97600000 | -1.66460000 | -0.40310000 |
| O  | -1.87700000 | 2.59540000  | -0.75780000 |
| C  | 4.09400000  | -0.19330000 | -0.23130000 |
| C  | 4.89780000  | 0.36650000  | -1.23860000 |
| C  | 4.58670000  | -1.30370000 | 0.47600000  |
| C  | 6.14380000  | -0.17960000 | -1.54250000 |

|    |             |             |             |
|----|-------------|-------------|-------------|
| H  | 4.54140000  | 1.21610000  | -1.81450000 |
| C  | 5.83400000  | -1.84640000 | 0.17430000  |
| H  | 3.99420000  | -1.72450000 | 1.28300000  |
| C  | 6.61670000  | -1.28750000 | -0.83740000 |
| H  | 6.74360000  | 0.25950000  | -2.33490000 |
| H  | 6.19780000  | -2.70160000 | 0.73690000  |
| H  | 7.59010000  | -1.70910000 | -1.07180000 |
| C  | 0.36370000  | 0.17140000  | 2.36540000  |
| F  | 1.06440000  | -0.82950000 | 2.92210000  |
| F  | -0.85200000 | 0.16220000  | 2.91820000  |
| F  | 0.97420000  | 1.33980000  | 2.70420000  |
| Si | -1.64990000 | 2.90630000  | -2.47730000 |
| H  | -2.75250000 | 2.21890000  | -3.15720000 |
| H  | -1.81530000 | 4.37630000  | -2.48660000 |
| H  | -0.28300000 | 2.52910000  | -2.87040000 |

### **Int10**

|   |             |            |             |
|---|-------------|------------|-------------|
| C | 1.07940000  | 2.28720000 | -0.69340000 |
| C | -0.07150000 | 1.26610000 | -0.63090000 |
| C | -1.51510000 | 1.74320000 | -0.61590000 |
| C | 2.45360000  | 1.64440000 | -0.83620000 |
| O | -1.71930000 | 3.03420000 | -0.68170000 |
| O | 0.93720000  | 3.48630000 | -0.69590000 |

|    |             |             |             |
|----|-------------|-------------|-------------|
| C  | 2.61510000  | 0.27480000  | -0.20560000 |
| C  | 1.57820000  | -0.35840000 | 0.36820000  |
| C  | 0.18730000  | 0.21430000  | 0.49570000  |
| O  | -0.74720000 | -0.82970000 | 0.40590000  |
| C  | -3.10140000 | 3.47850000  | -0.68750000 |
| Cl | -2.20830000 | -3.48220000 | 0.08940000  |
| H  | 0.01090000  | 0.66550000  | -1.54980000 |
| H  | -3.04070000 | 4.56410000  | -0.73610000 |
| H  | -3.61850000 | 3.07140000  | -1.55840000 |
| H  | -3.59860000 | 3.14950000  | 0.22650000  |
| H  | 3.19100000  | 2.35130000  | -0.44020000 |
| H  | 2.65190000  | 1.58380000  | -1.91780000 |
| H  | 1.68760000  | -1.34880000 | 0.79720000  |
| Cl | -2.47660000 | -1.32500000 | -2.49070000 |
| Cl | -4.17060000 | -0.88470000 | 0.96640000  |
| Ti | -2.34600000 | -1.28370000 | -0.25250000 |
| O  | -2.44540000 | 0.93210000  | -0.58520000 |
| C  | 3.97200000  | -0.33020000 | -0.22900000 |
| C  | 4.86090000  | -0.08510000 | -1.28990000 |
| C  | 4.40510000  | -1.16130000 | 0.82010000  |
| C  | 6.12500000  | -0.67270000 | -1.31540000 |
| H  | 4.56320000  | 0.55410000  | -2.11550000 |
| C  | 5.66860000  | -1.74590000 | 0.79560000  |
| H  | 3.75550000  | -1.32690000 | 1.67410000  |
| C  | 6.53350000  | -1.50690000 | -0.27440000 |

|   |             |             |             |
|---|-------------|-------------|-------------|
| H | 6.79040000  | -0.47730000 | -2.15170000 |
| H | 5.98260000  | -2.37960000 | 1.62030000  |
| H | 7.52080000  | -1.95990000 | -0.29160000 |
| C | 0.01870000  | 0.84350000  | 1.90600000  |
| F | 0.25390000  | -0.06310000 | 2.86240000  |
| F | -1.22630000 | 1.33200000  | 2.09070000  |
| F | 0.88360000  | 1.86710000  | 2.06930000  |

### TS5

|    |             |             |             |
|----|-------------|-------------|-------------|
| C  | -1.63070000 | 1.02710000  | 2.09070000  |
| C  | -0.64880000 | 0.05160000  | 1.64580000  |
| C  | 0.69250000  | 0.04480000  | 1.92030000  |
| C  | -2.80550000 | 1.34320000  | 1.08480000  |
| O  | 1.24150000  | 0.86850000  | 2.79560000  |
| O  | -1.59160000 | 1.68820000  | 3.11280000  |
| C  | -2.95530000 | 0.48880000  | -0.14730000 |
| C  | -1.93830000 | 0.32320000  | -1.05360000 |
| C  | -0.62980000 | 0.94470000  | -1.00550000 |
| O  | 0.40580000  | 0.28710000  | -1.21300000 |
| C  | 2.61320000  | 0.68480000  | 3.20100000  |
| Cl | 2.92610000  | 1.74470000  | -0.20280000 |
| H  | -0.95260000 | -0.67940000 | 0.91520000  |
| H  | 2.78170000  | 1.45980000  | 3.94790000  |
| H  | 2.74560000  | -0.30330000 | 3.64930000  |
| H  | 3.29550000  | 0.81370000  | 2.36110000  |

|    |             |             |             |
|----|-------------|-------------|-------------|
| H  | -2.60880000 | 2.37950000  | 0.79070000  |
| H  | -3.73150000 | 1.37770000  | 1.66130000  |
| H  | -1.97690000 | -0.51880000 | -1.74000000 |
| C  | -0.47180000 | 2.49480000  | -0.90790000 |
| Cl | 1.34340000  | -2.64380000 | -0.74750000 |
| Cl | 2.71220000  | -0.41040000 | -2.94130000 |
| Si | 1.34670000  | -2.76700000 | 1.61040000  |
| H  | 0.59680000  | -2.31740000 | 2.81620000  |
| H  | 0.69020000  | -4.08570000 | 1.37400000  |
| H  | 2.78190000  | -2.97260000 | 1.87510000  |
| Cl | 4.32390000  | -1.23080000 | -0.11760000 |
| Ti | 2.38500000  | -0.34770000 | -0.75540000 |
| O  | 1.50120000  | -0.79820000 | 1.23480000  |
| C  | -4.18220000 | -0.31830000 | -0.30590000 |
| C  | -4.87870000 | -0.81830000 | 0.81140000  |
| C  | -4.68160000 | -0.60950000 | -1.59080000 |
| C  | -6.02140000 | -1.59720000 | 0.64670000  |
| H  | -4.50870000 | -0.62760000 | 1.81390000  |
| C  | -5.83320000 | -1.37340000 | -1.75180000 |
| H  | -4.17990000 | -0.20200000 | -2.46350000 |
| C  | -6.50480000 | -1.87440000 | -0.63340000 |
| H  | -6.53470000 | -1.98810000 | 1.52040000  |
| H  | -6.21160000 | -1.57270000 | -2.75020000 |
| H  | -7.40240000 | -2.47300000 | -0.75950000 |
| F  | 0.41880000  | 2.88750000  | -1.82380000 |

|   |             |            |             |
|---|-------------|------------|-------------|
| F | -0.05860000 | 2.89120000 | 0.30410000  |
| F | -1.63820000 | 3.11560000 | -1.17480000 |

### Int10'

|    |             |             |             |
|----|-------------|-------------|-------------|
| C  | 0.46850000  | -1.30910000 | 1.08670000  |
| C  | -0.94180000 | -1.76680000 | 0.97070000  |
| C  | -1.33140000 | -2.61080000 | -0.18900000 |
| C  | 1.34550000  | -1.29990000 | -0.20070000 |
| O  | -1.45150000 | -3.79650000 | -0.32800000 |
| O  | -1.68130000 | -1.70060000 | -1.19970000 |
| O  | 0.95590000  | -0.96860000 | 2.14820000  |
| C  | 2.34290000  | -0.17230000 | -0.19830000 |
| C  | 1.93150000  | 1.13810000  | -0.28580000 |
| H  | 2.67120000  | 1.92750000  | -0.33980000 |
| C  | 0.56700000  | 1.55450000  | -0.31030000 |
| O  | -0.42110000 | 0.80370000  | -0.24690000 |
| Ti | -2.27270000 | -0.07220000 | 0.31760000  |
| C  | -2.29980000 | -2.23430000 | -2.39720000 |
| Cl | -3.14820000 | 1.00270000  | -1.48630000 |
| Cl | -2.23800000 | 1.20310000  | 2.12280000  |
| H  | -1.62100000 | -2.95580000 | -2.85430000 |
| H  | -3.24120000 | -2.71880000 | -2.13140000 |
| H  | -2.47180000 | -1.37840000 | -3.04600000 |
| H  | 0.70420000  | -1.23610000 | -1.08310000 |

|    |             |             |             |
|----|-------------|-------------|-------------|
| H  | 1.85460000  | -2.26840000 | -0.21770000 |
| Cl | -4.07070000 | -1.29390000 | 0.84240000  |
| H  | -1.27950000 | -2.18740000 | 1.91800000  |
| C  | 0.30230000  | 3.06820000  | -0.48800000 |
| F  | -0.93330000 | 3.39610000  | -0.12410000 |
| F  | 1.17830000  | 3.79230000  | 0.23720000  |
| F  | 0.47700000  | 3.38650000  | -1.78650000 |
| C  | 3.77760000  | -0.47330000 | -0.09570000 |
| C  | 4.32070000  | -1.63680000 | -0.67780000 |
| C  | 4.64910000  | 0.40590000  | 0.58140000  |
| C  | 5.68620000  | -1.89610000 | -0.60860000 |
| H  | 3.68050000  | -2.32280000 | -1.22310000 |
| C  | 6.00890000  | 0.12990000  | 0.67080000  |
| H  | 4.24580000  | 1.27950000  | 1.08300000  |
| C  | 6.53360000  | -1.01730000 | 0.06940000  |
| H  | 6.08870000  | -2.78710000 | -1.08150000 |
| H  | 6.65980000  | 0.80570000  | 1.21750000  |
| H  | 7.59690000  | -1.22910000 | 0.13590000  |

## TS6

|   |             |            |             |
|---|-------------|------------|-------------|
| C | 0.54710000  | 0.65800000 | -1.73330000 |
| C | -0.88730000 | 0.58350000 | -1.35950000 |
| C | -1.71340000 | 1.81550000 | -1.26170000 |
| C | 1.54780000  | 1.47290000 | -0.84130000 |

|    |             |             |             |
|----|-------------|-------------|-------------|
| O  | -2.91860000 | 1.85340000  | -1.40450000 |
| O  | -0.98250000 | 2.94630000  | -1.03290000 |
| O  | 1.02200000  | 0.01480000  | -2.65330000 |
| C  | 2.04600000  | 0.50050000  | 0.18700000  |
| C  | 1.16260000  | -0.05090000 | 1.08080000  |
| H  | 1.42850000  | -0.96770000 | 1.60360000  |
| C  | -0.19970000 | 0.33030000  | 1.30410000  |
| O  | -1.09000000 | -0.56280000 | 1.55280000  |
| Ti | -1.71180000 | -1.52630000 | -0.01870000 |
| C  | -1.74970000 | 4.15670000  | -0.92660000 |
| Cl | -3.70480000 | -1.17470000 | -0.83350000 |
| Cl | -2.20190000 | -3.21620000 | 1.36240000  |
| H  | -2.31330000 | 4.33570000  | -1.84510000 |
| H  | -2.44530000 | 4.09500000  | -0.08630000 |
| H  | -1.01920000 | 4.94990000  | -0.76260000 |
| H  | 1.03560000  | 2.32770000  | -0.40720000 |
| H  | 2.34850000  | 1.80970000  | -1.49820000 |
| Cl | -0.37970000 | -2.63930000 | -1.37650000 |
| H  | -1.38080000 | -0.08010000 | -2.07300000 |
| C  | -0.59970000 | 1.70830000  | 1.89060000  |
| F  | -1.85150000 | 2.04770000  | 1.57290000  |
| F  | -0.53750000 | 1.54120000  | 3.22770000  |
| F  | 0.22750000  | 2.71160000  | 1.57280000  |
| C  | 3.41810000  | -0.02540000 | 0.08500000  |
| C  | 4.46880000  | 0.83140000  | -0.29880000 |



|   |            |             |             |
|---|------------|-------------|-------------|
| C | 3.72710000 | -1.36610000 | 0.39360000  |
| C | 5.78240000 | 0.37340000  | -0.33920000 |
| H | 4.26190000 | 1.87110000  | -0.53110000 |
| C | 5.03790000 | -1.82630000 | 0.32870000  |
| H | 2.93210000 | -2.06550000 | 0.63170000  |
| C | 6.07140000 | -0.95700000 | -0.02960000 |
| H | 6.58070000 | 1.05520000  | -0.61770000 |
| H | 5.25190000 | -2.86840000 | 0.54680000  |
| H | 7.09480000 | -1.31790000 | -0.07750000 |

### **Int11**

|    |             |             |             |
|----|-------------|-------------|-------------|
| C  | 1.08860000  | 2.17250000  | -0.97890000 |
| C  | -0.06060000 | 1.18180000  | -0.73280000 |
| C  | -1.49280000 | 1.69040000  | -0.74370000 |
| C  | 2.49710000  | 1.65700000  | -0.68800000 |
| O  | -2.43470000 | 0.89230000  | -0.71700000 |
| O  | -1.67220000 | 2.98630000  | -0.76680000 |
| O  | 0.92380000  | 3.26650000  | -1.46580000 |
| C  | 2.61440000  | 0.26510000  | -0.10510000 |
| C  | 1.55440000  | -0.33620000 | 0.45980000  |
| H  | 1.63580000  | -1.30110000 | 0.94850000  |
| C  | 0.17420000  | 0.27140000  | 0.51290000  |
| O  | -0.78210000 | -0.75660000 | 0.53650000  |
| Ti | -2.33980000 | -1.29260000 | -0.16170000 |
| C  | -3.04500000 | 3.45680000  | -0.73590000 |

|    |             |             |             |
|----|-------------|-------------|-------------|
| Cl | -4.22530000 | -0.78880000 | 0.91670000  |
| Cl | -2.20790000 | -3.44300000 | 0.41130000  |
| H  | -3.58520000 | 3.08090000  | -1.60660000 |
| H  | -3.53120000 | 3.11480000  | 0.17940000  |
| H  | -2.96500000 | 4.54200000  | -0.76090000 |
| H  | 2.95590000  | 2.39590000  | -0.01690000 |
| H  | 3.05880000  | 1.73160000  | -1.62760000 |
| Cl | -2.35230000 | -1.56430000 | -2.38510000 |
| H  | -0.00820000 | 0.47160000  | -1.57230000 |
| C  | 0.00580000  | 1.07010000  | 1.83320000  |
| F  | -1.25110000 | 1.54220000  | 1.97610000  |
| F  | 0.28480000  | 0.31040000  | 2.89700000  |
| F  | 0.83900000  | 2.13680000  | 1.83980000  |
| C  | 3.94630000  | -0.38900000 | -0.15270000 |
| C  | 5.12680000  | 0.37380000  | -0.12600000 |
| C  | 4.06110000  | -1.78850000 | -0.23510000 |
| C  | 6.37760000  | -0.24200000 | -0.15520000 |
| H  | 5.07460000  | 1.45650000  | -0.06180000 |
| C  | 5.31040000  | -2.40240000 | -0.26820000 |
| H  | 3.16430000  | -2.39720000 | -0.30210000 |
| C  | 6.47470000  | -1.63180000 | -0.22530000 |
| H  | 7.27640000  | 0.36750000  | -0.12270000 |
| H  | 5.37450000  | -3.48450000 | -0.33980000 |
| H  | 7.44910000  | -2.11130000 | -0.25460000 |

## TS7

|    |             |             |             |
|----|-------------|-------------|-------------|
| C  | 0.05510000  | 0.39540000  | 1.17380000  |
| O  | 1.08510000  | -0.22500000 | 0.73940000  |
| Ti | 2.51170000  | -0.67960000 | -0.60470000 |
| Cl | 4.05550000  | -1.32840000 | -2.12070000 |
| Cl | 3.36930000  | -1.98630000 | 1.02850000  |
| O  | 1.14500000  | -1.07050000 | -1.78280000 |
| C  | -0.12940000 | -0.64780000 | -1.86400000 |
| C  | -0.28320000 | 0.77610000  | -1.99040000 |
| H  | 0.63870000  | 1.34040000  | -2.02260000 |
| C  | -1.45090000 | 1.48460000  | -2.03870000 |
| O  | -2.65840000 | 0.92470000  | -2.04300000 |
| Si | -4.13980000 | 1.77150000  | -2.01170000 |
| Cl | 3.10940000  | 1.50660000  | -0.67090000 |
| H  | -5.13720000 | 0.68130000  | -2.01300000 |
| H  | -4.24620000 | 2.57650000  | -0.77130000 |
| H  | -4.29250000 | 2.62440000  | -3.21180000 |
| O  | -1.53580000 | 2.82350000  | -2.09920000 |
| C  | -1.14210000 | -1.58130000 | -1.74920000 |
| H  | -2.15810000 | -1.31430000 | -1.99730000 |
| H  | -0.86990000 | -2.62830000 | -1.77190000 |
| C  | -0.33620000 | 3.61730000  | -2.08370000 |
| H  | 0.27740000  | 3.39700000  | -2.96210000 |
| H  | -0.67740000 | 4.65160000  | -2.11490000 |

|    |             |             |             |
|----|-------------|-------------|-------------|
| H  | 0.23320000  | 3.43050000  | -1.16910000 |
| C  | 0.28740000  | 1.67030000  | 1.90780000  |
| C  | -0.68020000 | 2.68780000  | 1.99510000  |
| C  | 1.52910000  | 1.85730000  | 2.53920000  |
| C  | -0.41130000 | 3.85860000  | 2.69930000  |
| H  | -1.63410000 | 2.58430000  | 1.48720000  |
| C  | 1.78690000  | 3.02200000  | 3.25760000  |
| H  | 2.27810000  | 1.07700000  | 2.46890000  |
| C  | 0.82000000  | 4.02600000  | 3.33860000  |
| H  | -1.16250000 | 4.64200000  | 2.74810000  |
| H  | 2.74690000  | 3.14740000  | 3.74960000  |
| H  | 1.02530000  | 4.93750000  | 3.89310000  |
| C  | -1.26020000 | -0.09970000 | 1.03530000  |
| C  | -1.70920000 | -1.34100000 | 0.56430000  |
| H  | -2.06670000 | 0.56900000  | 1.31140000  |
| C  | -1.05590000 | -2.68890000 | 0.89910000  |
| F  | -1.64750000 | -3.69700000 | 0.22690000  |
| F  | -1.28210000 | -2.92620000 | 2.22240000  |
| F  | 0.25380000  | -2.76040000 | 0.69090000  |
| O  | -3.05520000 | -1.46120000 | 0.44130000  |
| Si | -4.24460000 | -2.12140000 | 1.44830000  |
| H  | -4.15120000 | -1.49570000 | 2.79120000  |
| H  | -5.50810000 | -1.74150000 | 0.77860000  |
| H  | -4.13810000 | -3.59290000 | 1.55810000  |

## Int12

|    |             |             |             |
|----|-------------|-------------|-------------|
| C  | 1.69280000  | -0.89990000 | 0.52390000  |
| O  | 1.96500000  | 0.21660000  | -0.16790000 |
| Ti | 1.32310000  | 1.86390000  | -0.63050000 |
| Cl | -0.21630000 | 3.20860000  | -1.68380000 |
| Cl | 2.92190000  | 2.22000000  | -2.15900000 |
| O  | -0.40230000 | 1.10330000  | 0.25010000  |
| C  | -1.49090000 | 0.48810000  | 0.29710000  |
| C  | -2.55290000 | 1.11600000  | 1.02890000  |
| H  | -2.28180000 | 2.07630000  | 1.44620000  |
| C  | -3.84040000 | 0.67810000  | 1.19920000  |
| O  | -4.30120000 | -0.46880000 | 0.72000000  |
| Si | -5.91730000 | -1.03180000 | 0.87620000  |
| Cl | 1.98340000  | 3.11850000  | 1.07890000  |
| H  | -5.86820000 | -2.32050000 | 0.15740000  |
| H  | -6.25200000 | -1.22760000 | 2.30430000  |
| H  | -6.84920000 | -0.08570000 | 0.22440000  |
| O  | -4.78930000 | 1.34910000  | 1.86000000  |
| C  | -1.67280000 | -0.85410000 | -0.38510000 |
| C  | -4.50360000 | 2.63600000  | 2.43690000  |
| H  | -4.19860000 | 3.34130000  | 1.65900000  |
| H  | -5.43910000 | 2.95750000  | 2.89280000  |
| H  | -3.72350000 | 2.54660000  | 3.19820000  |
| C  | 2.65270000  | -1.17400000 | 1.62930000  |

|    |             |             |             |
|----|-------------|-------------|-------------|
| C  | 2.29810000  | -1.94330000 | 2.74940000  |
| C  | 3.95200000  | -0.64730000 | 1.55570000  |
| C  | 3.22570000  | -2.19880000 | 3.75670000  |
| H  | 1.28530000  | -2.32280000 | 2.84840000  |
| C  | 4.87830000  | -0.90600000 | 2.56470000  |
| H  | 4.22920000  | -0.04040000 | 0.70070000  |
| C  | 4.52110000  | -1.68430000 | 3.66650000  |
| H  | 2.93230000  | -2.79070000 | 4.61960000  |
| H  | 5.88140000  | -0.49540000 | 2.48870000  |
| H  | 5.24270000  | -1.88130000 | 4.45470000  |
| C  | 0.66540000  | -1.72560000 | 0.22640000  |
| C  | 0.06980000  | -1.13520000 | -2.22990000 |
| F  | -0.83600000 | -1.44730000 | -3.17440000 |
| F  | 1.24180000  | -1.68740000 | -2.58130000 |
| F  | 0.21160000  | 0.21870000  | -2.30060000 |
| O  | -0.91850000 | -2.95620000 | -1.05990000 |
| Si | -0.14220000 | -4.34310000 | -1.60400000 |
| H  | 1.13700000  | -4.58240000 | -0.88810000 |
| H  | -1.10640000 | -5.42630000 | -1.29560000 |
| H  | 0.11190000  | -4.31010000 | -3.06530000 |
| C  | -0.40910000 | -1.63890000 | -0.83800000 |
| H  | -2.35460000 | -0.73380000 | -1.23730000 |
| H  | -2.19560000 | -1.52140000 | 0.30370000  |
| H  | 0.55770000  | -2.61600000 | 0.83440000  |

**TS8**

|    |             |             |             |
|----|-------------|-------------|-------------|
| C  | -1.56690000 | 0.49520000  | -0.98780000 |
| C  | -2.85150000 | 1.06370000  | -0.98830000 |
| C  | -4.03630000 | 0.41260000  | -0.65610000 |
| C  | -0.40310000 | 1.39680000  | -1.35760000 |
| O  | -4.25830000 | -0.87020000 | -0.57270000 |
| O  | -5.07890000 | 1.19130000  | -0.39960000 |
| O  | -1.33920000 | -0.73060000 | -0.72550000 |
| C  | 0.37280000  | 2.00310000  | -0.12580000 |
| C  | 1.84600000  | 1.69260000  | -0.21730000 |
| C  | 2.30010000  | 0.42320000  | -0.31280000 |
| O  | 1.41480000  | -0.59670000 | -0.24160000 |
| Ti | 0.16270000  | -1.72670000 | 0.38540000  |
| C  | -6.35190000 | 0.58430000  | -0.09860000 |
| Cl | 1.57720000  | -2.64810000 | 1.91180000  |
| H  | -2.93140000 | 2.13540000  | -1.11480000 |
| H  | -6.28110000 | -0.02130000 | 0.80730000  |
| H  | -7.02870000 | 1.42400000  | 0.05440000  |
| H  | -6.69170000 | -0.03380000 | -0.93310000 |
| H  | -0.77130000 | 2.20580000  | -1.99170000 |
| H  | 0.28670000  | 0.80420000  | -1.95750000 |
| O  | -0.22620000 | 1.50320000  | 1.06750000  |
| Si | 0.13570000  | 1.89440000  | 2.67440000  |
| H  | -0.40060000 | 0.77130000  | 3.46670000  |
| H  | 1.59940000  | 2.03510000  | 2.87420000  |

|    |             |             |             |
|----|-------------|-------------|-------------|
| H  | -0.54070000 | 3.15460000  | 3.07420000  |
| H  | 2.55280000  | 2.51210000  | -0.22180000 |
| Cl | -1.49100000 | -1.70210000 | 1.96490000  |
| Cl | 0.04880000  | -3.45980000 | -1.01940000 |
| Si | -3.63050000 | -2.26910000 | -1.37110000 |
| H  | -4.89500000 | -2.95690000 | -1.73760000 |
| H  | -2.93140000 | -1.85890000 | -2.60430000 |
| H  | -2.87350000 | -3.08150000 | -0.41620000 |
| C  | 0.17810000  | 3.53270000  | -0.17200000 |
| F  | 0.82000000  | 4.14280000  | 0.84980000  |
| F  | -1.12390000 | 3.87180000  | -0.09100000 |
| F  | 0.66720000  | 4.05260000  | -1.31790000 |
| C  | 3.71280000  | 0.04710000  | -0.55880000 |
| C  | 4.60690000  | 0.96470000  | -1.13920000 |
| C  | 4.17830000  | -1.23610000 | -0.23230000 |
| C  | 5.93560000  | 0.61540000  | -1.36220000 |
| H  | 4.25660000  | 1.94650000  | -1.44260000 |
| C  | 5.50940000  | -1.58250000 | -0.46110000 |
| H  | 3.50190000  | -1.95370000 | 0.21550000  |
| C  | 6.39310000  | -0.66020000 | -1.02190000 |
| H  | 6.61130000  | 1.33540000  | -1.81590000 |
| H  | 5.85410000  | -2.57810000 | -0.19610000 |
| H  | 7.42920000  | -0.93400000 | -1.20130000 |

**Int12**



|    |             |             |             |
|----|-------------|-------------|-------------|
| C  | -1.54243700 | 0.81129400  | -0.83188100 |
| C  | -2.78553100 | 1.48082700  | -0.94547300 |
| C  | -4.03048100 | 0.93315900  | -0.67507900 |
| C  | -0.30532400 | 1.58703800  | -1.31248900 |
| O  | -4.33264000 | -0.33475100 | -0.55379000 |
| O  | -5.04007300 | 1.78721200  | -0.53326500 |
| O  | -1.40614700 | -0.36087600 | -0.39928100 |
| C  | 0.56003100  | 2.17150300  | -0.22252200 |
| C  | 1.77578800  | 1.73586600  | 0.13975200  |
| C  | 2.40217000  | 0.50946900  | -0.40740500 |
| O  | 1.70926600  | -0.49080300 | -0.65704100 |
| Ti | 0.11902400  | -1.72192200 | 0.39196400  |
| C  | -6.37353100 | 1.26826900  | -0.36308900 |
| Cl | -0.12850000 | -2.64115100 | -1.74497700 |
| H  | -2.77728800 | 2.54126600  | -1.16246500 |
| H  | -6.44388200 | 0.68482800  | 0.55741300  |
| H  | -7.00918400 | 2.15120300  | -0.30434700 |
| H  | -6.66106200 | 0.64855000  | -1.21620100 |
| H  | -0.63747700 | 2.40500600  | -1.95821400 |
| H  | 0.27813100  | 0.88757000  | -1.91335700 |
| H  | 2.34137300  | 2.29626300  | 0.87599400  |
| Cl | 1.89471100  | -3.00665700 | 0.99143000  |
| Si | -3.83725500 | -1.70332600 | -1.49820300 |
| H  | -5.14060300 | -2.19845100 | -2.01442300 |
| H  | -3.02296400 | -1.19825700 | -2.61885500 |

|    |             |             |             |
|----|-------------|-------------|-------------|
| H  | -3.22070900 | -2.68862600 | -0.60855200 |
| C  | -0.01701600 | 3.37749000  | 0.48687100  |
| F  | 0.88685800  | 4.03819800  | 1.23201700  |
| F  | -1.02222800 | 2.99578500  | 1.30909800  |
| F  | -0.54300900 | 4.26351000  | -0.39203000 |
| C  | 3.85613700  | 0.47542800  | -0.64907400 |
| C  | 4.64191700  | 1.64248700  | -0.62557300 |
| C  | 4.46140400  | -0.76683500 | -0.91965700 |
| C  | 6.01022900  | 1.56746700  | -0.86745600 |
| H  | 4.18373100  | 2.60856200  | -0.43663000 |
| C  | 5.83079900  | -0.83541000 | -1.15020500 |
| H  | 3.84410800  | -1.65869500 | -0.92820900 |
| C  | 6.60495100  | 0.32903300  | -1.12573700 |
| H  | 6.61305300  | 2.47070800  | -0.85499900 |
| H  | 6.29720500  | -1.79595600 | -1.34760400 |
| H  | 7.67465000  | 0.27182200  | -1.30820000 |
| Cl | -1.44789700 | -2.95705300 | 1.45572500  |
| O  | 0.28624000  | -0.47813400 | 1.69030900  |
| Si | -0.03116900 | -0.01647300 | 3.25424800  |
| H  | 0.33122200  | -1.09050200 | 4.21324500  |
| H  | 0.78300800  | 1.19309200  | 3.56366700  |
| H  | -1.46763100 | 0.33260600  | 3.41375500  |

#### **Int14**

|   |            |             |            |
|---|------------|-------------|------------|
| C | 2.12960000 | -0.36860000 | 0.13080000 |
|---|------------|-------------|------------|

|    |             |             |             |
|----|-------------|-------------|-------------|
| C  | 3.42670000  | 0.26060000  | 0.11640000  |
| C  | 3.76180000  | 1.36010000  | 0.86840000  |
| C  | 1.96380000  | -1.60920000 | -0.78660000 |
| O  | 2.92090000  | 1.88820000  | 1.73850000  |
| O  | 1.17070000  | -0.02250000 | 0.81750000  |
| C  | 0.68940000  | -1.55410000 | -1.58420000 |
| C  | -0.55490000 | -1.38720000 | -1.10830000 |
| C  | -0.96960000 | -1.26920000 | 0.30950000  |
| O  | -1.78040000 | -0.37320000 | 0.62370000  |
| C  | 3.26850000  | 3.10650000  | 2.42010000  |
| Cl | -3.17090000 | 1.72810000  | 2.12850000  |
| H  | 4.18190000  | -0.14370000 | -0.54690000 |
| H  | 2.39910000  | 3.33210000  | 3.03650000  |
| H  | 4.15370000  | 2.96410000  | 3.04490000  |
| H  | 3.44450000  | 3.91410000  | 1.70510000  |
| H  | 1.95050000  | -2.47110000 | -0.10850000 |
| H  | 2.82250000  | -1.73310000 | -1.44890000 |
| H  | -1.36950000 | -1.23500000 | -1.81100000 |
| C  | -0.63810000 | -2.29730000 | 1.32190000  |
| C  | -0.24590000 | -3.59220000 | 0.94720000  |
| C  | -0.80280000 | -1.98720000 | 2.68260000  |
| C  | -0.00790000 | -4.56020000 | 1.92170000  |
| H  | -0.15620000 | -3.84660000 | -0.10450000 |
| C  | -0.55250000 | -2.95310000 | 3.65070000  |
| H  | -1.11390000 | -0.98550000 | 2.95830000  |

|    |             |             |             |
|----|-------------|-------------|-------------|
| C  | -0.15510000 | -4.24020000 | 3.27270000  |
| H  | 0.28260000  | -5.56420000 | 1.62620000  |
| H  | -0.66990000 | -2.70670000 | 4.70200000  |
| H  | 0.03270000  | -4.99470000 | 4.03180000  |
| C  | 0.89430000  | -1.58520000 | -3.08060000 |
| Cl | -1.10970000 | 2.03460000  | -1.04640000 |
| Cl | -4.14900000 | -0.34080000 | -1.04150000 |
| Cl | -4.27310000 | 2.92660000  | -0.74990000 |
| Ti | -2.94530000 | 1.27580000  | -0.04240000 |
| O  | 4.94990000  | 1.97630000  | 0.79390000  |
| F  | 1.49800000  | -2.74460000 | -3.44380000 |
| F  | -0.24540000 | -1.48720000 | -3.78330000 |
| F  | 1.71010000  | -0.58090000 | -3.47440000 |
| Si | 6.22000000  | 1.72090000  | -0.30730000 |
| H  | 6.74830000  | 0.34410000  | -0.15500000 |
| H  | 5.73070000  | 1.93920000  | -1.68800000 |
| H  | 7.22860000  | 2.72610000  | 0.08320000  |

### **Int15**

|   |             |             |            |
|---|-------------|-------------|------------|
| C | -1.69480000 | 0.45210000  | 1.97830000 |
| C | -0.33450000 | -0.01520000 | 1.79760000 |
| C | 0.80590000  | 0.76020000  | 1.79500000 |
| C | -2.76090000 | -0.49910000 | 1.39170000 |
| O | 0.82440000  | 1.98770000  | 2.29600000 |
| O | -2.04210000 | 1.51180000  | 2.48170000 |

|    |             |             |             |
|----|-------------|-------------|-------------|
| C  | -2.42990000 | -1.18650000 | 0.08080000  |
| C  | -1.51700000 | -0.85170000 | -0.84360000 |
| C  | -0.59310000 | 0.32260000  | -0.88090000 |
| O  | 0.64260000  | 0.12100000  | -1.02590000 |
| C  | 2.02340000  | 2.77180000  | 2.15880000  |
| Cl | 3.44840000  | 0.28680000  | -1.96940000 |
| H  | -0.18710000 | -1.03300000 | 1.46220000  |
| H  | 1.79610000  | 3.71450000  | 2.65560000  |
| H  | 2.86560000  | 2.27600000  | 2.64770000  |
| H  | 2.26060000  | 2.94670000  | 1.10610000  |
| H  | -3.68820000 | 0.07720000  | 1.29770000  |
| H  | -2.96630000 | -1.28050000 | 2.13650000  |
| H  | -1.37130000 | -1.51730000 | -1.69110000 |
| C  | -1.11050000 | 1.69110000  | -1.03160000 |
| C  | -2.49030000 | 1.96410000  | -1.07500000 |
| C  | -0.19180000 | 2.75210000  | -1.16890000 |
| C  | -2.93990000 | 3.27150000  | -1.23280000 |
| H  | -3.20530000 | 1.15310000  | -1.00220000 |
| C  | -0.64670000 | 4.05360000  | -1.32840000 |
| H  | 0.87000000  | 2.53140000  | -1.16130000 |
| C  | -2.02160000 | 4.31590000  | -1.35610000 |
| H  | -4.00580000 | 3.47520000  | -1.26300000 |
| H  | 0.06470000  | 4.86710000  | -1.43580000 |
| H  | -2.37530000 | 5.33560000  | -1.47990000 |
| C  | -3.24820000 | -2.43930000 | -0.15790000 |

|    |             |             |             |
|----|-------------|-------------|-------------|
| Cl | 1.54080000  | -2.72400000 | -0.68560000 |
| Cl | 4.22910000  | -1.44660000 | 0.77680000  |
| Ti | 2.39910000  | -0.70510000 | -0.27290000 |
| O  | 1.90550000  | 0.32280000  | 1.21860000  |
| F  | -4.56830000 | -2.14420000 | -0.10330000 |
| F  | -3.01270000 | -3.02030000 | -1.34810000 |
| F  | -3.00710000 | -3.36160000 | 0.79980000  |

### TS9

|    |             |             |             |
|----|-------------|-------------|-------------|
| C  | 0.26750000  | 1.07110000  | 1.89590000  |
| C  | -0.18360000 | -0.28990000 | 1.54330000  |
| C  | 0.68230000  | -1.46860000 | 1.72180000  |
| C  | 1.51650000  | 1.64380000  | 1.17680000  |
| O  | 0.31670000  | -2.62730000 | 1.61940000  |
| O  | 1.96940000  | -1.15040000 | 2.05150000  |
| O  | -0.36800000 | 1.80560000  | 2.63430000  |
| C  | 1.08840000  | 2.09740000  | -0.19240000 |
| C  | 0.54180000  | 1.30720000  | -1.12950000 |
| H  | 0.11460000  | 1.75160000  | -2.02640000 |
| C  | 0.37550000  | -0.16000000 | -1.07930000 |
| O  | -0.79930000 | -0.60700000 | -1.44760000 |
| Ti | -2.25730000 | -0.49990000 | -0.24860000 |
| C  | 2.82760000  | -2.26930000 | 2.32640000  |
| Cl | -2.87060000 | -2.30760000 | 0.83440000  |

|    |             |             |             |
|----|-------------|-------------|-------------|
| Cl | -3.70110000 | -0.57020000 | -1.93810000 |
| H  | 2.42340000  | -2.86660000 | 3.14740000  |
| H  | 2.93480000  | -2.90370000 | 1.44370000  |
| H  | 3.78850000  | -1.83570000 | 2.60650000  |
| H  | 2.29360000  | 0.87960000  | 1.11940000  |
| H  | 1.88380000  | 2.48570000  | 1.76490000  |
| Cl | -2.91660000 | 1.37520000  | 0.68570000  |
| H  | -1.14550000 | -0.49390000 | 2.01820000  |
| C  | 1.49960000  | -1.08360000 | -1.17680000 |
| C  | 2.82710000  | -0.60830000 | -1.25740000 |
| C  | 1.25120000  | -2.46860000 | -1.30110000 |
| C  | 3.87490000  | -1.49620000 | -1.46180000 |
| H  | 3.02260000  | 0.45610000  | -1.19530000 |
| C  | 2.30620000  | -3.34870000 | -1.50780000 |
| H  | 0.23570000  | -2.83720000 | -1.23260000 |
| C  | 3.61620000  | -2.86610000 | -1.58860000 |
| H  | 4.89180000  | -1.12350000 | -1.53700000 |
| H  | 2.10850000  | -4.41170000 | -1.60430000 |
| H  | 4.43760000  | -3.55720000 | -1.75700000 |
| C  | 1.17580000  | 3.58410000  | -0.45060000 |
| F  | 0.71930000  | 3.93580000  | -1.66840000 |
| F  | 2.46780000  | 3.98240000  | -0.37090000 |
| F  | 0.48190000  | 4.27760000  | 0.46770000  |

**Int16**

|    |             |             |             |
|----|-------------|-------------|-------------|
| C  | -1.30830000 | 2.07740000  | 1.06940000  |
| C  | -2.05050000 | 0.80490000  | 1.05220000  |
| C  | -1.78910000 | -0.34640000 | 1.85760000  |
| C  | 0.21090000  | 2.05350000  | 1.39060000  |
| O  | -2.18200000 | -1.46550000 | 1.39030000  |
| O  | -1.06980000 | -0.28790000 | 2.96510000  |
| O  | -1.84590000 | 3.13130000  | 0.78250000  |
| C  | 1.07980000  | 2.10220000  | 0.15790000  |
| C  | 1.63380000  | 1.04990000  | -0.47050000 |
| H  | 2.31260000  | 1.23450000  | -1.29560000 |
| C  | 1.43020000  | -0.36590000 | -0.09850000 |
| O  | 0.30570000  | -0.80700000 | 0.21480000  |
| Ti | -1.89060000 | -0.88800000 | -0.56210000 |
| C  | -0.66250000 | -1.55040000 | 3.55160000  |
| Cl | -4.05080000 | -0.97970000 | -1.04630000 |
| Cl | -1.24430000 | -2.94250000 | -1.22280000 |
| H  | -1.54020000 | -2.12460000 | 3.85230000  |
| H  | -0.07240000 | -2.11890000 | 2.83040000  |
| H  | -0.06450000 | -1.27570000 | 4.41960000  |
| H  | 0.45760000  | 1.17060000  | 1.97870000  |
| H  | 0.40990000  | 2.94090000  | 1.99700000  |
| Cl | -1.25960000 | 0.52100000  | -2.18070000 |
| C  | 2.59250000  | -1.27650000 | -0.10380000 |
| C  | 3.91150000  | -0.78720000 | -0.15340000 |



|   |             |             |             |
|---|-------------|-------------|-------------|
| C | 2.36960000  | -2.66570000 | -0.04320000 |
| C | 4.98590000  | -1.67150000 | -0.14190000 |
| H | 4.09630000  | 0.28200000  | -0.18170000 |
| C | 3.44730000  | -3.54400000 | -0.04390000 |
| H | 1.34950000  | -3.03370000 | -0.02100000 |
| C | 4.75460000  | -3.04900000 | -0.09100000 |
| H | 6.00180000  | -1.28930000 | -0.17300000 |
| H | 3.27140000  | -4.61520000 | -0.01270000 |
| H | 5.59470000  | -3.73800000 | -0.08970000 |
| C | 1.39820000  | 3.49170000  | -0.36960000 |
| F | 2.34310000  | 3.47440000  | -1.33420000 |
| F | 1.86410000  | 4.28100000  | 0.62630000  |
| F | 0.30610000  | 4.07720000  | -0.87940000 |
| H | -3.10210000 | 0.92500000  | 0.79300000  |

### **Int17**

|    |             |             |            |
|----|-------------|-------------|------------|
| C  | 3.17850000  | 0.79440000  | 0.28290000 |
| C  | 2.04260000  | 0.06430000  | 0.53990000 |
| H  | 2.14550000  | -1.01120000 | 0.52540000 |
| C  | 0.70160000  | 0.49890000  | 0.75290000 |
| C  | 0.32770000  | 1.97390000  | 1.05800000 |
| O  | -0.27120000 | -0.28040000 | 0.74860000 |
| Ti | -0.82920000 | -2.32790000 | 0.39610000 |

|    |             |             |             |
|----|-------------|-------------|-------------|
| Cl | -1.63560000 | -4.34080000 | -0.17950000 |
| Cl | -2.42030000 | -1.89640000 | 1.97850000  |
| Cl | 0.76450000  | -3.02300000 | 1.80570000  |
| O  | -2.41330000 | -1.37990000 | -1.07640000 |
| Si | -3.52620000 | -2.31580000 | -1.99630000 |
| C  | -2.43660000 | 0.02710000  | -1.32290000 |
| C  | -3.29920000 | 0.71100000  | -0.37350000 |
| H  | -3.80690000 | 0.07110000  | 0.33360000  |
| C  | -3.44420000 | 2.04830000  | -0.24070000 |
| O  | -2.83520000 | 2.94130000  | -1.03790000 |
| Si | -2.76430000 | 4.60780000  | -0.72880000 |
| Cl | 0.52830000  | -2.16620000 | -1.47740000 |
| H  | -1.84720000 | 5.09360000  | -1.78540000 |
| H  | -4.09150000 | 5.25070000  | -0.88340000 |
| H  | -2.19930000 | 4.90090000  | 0.60930000  |
| H  | -4.32120000 | -3.16480000 | -1.08520000 |
| H  | -4.41380000 | -1.34240000 | -2.67520000 |
| H  | -2.79440000 | -3.12380000 | -2.99540000 |
| O  | -4.19680000 | 2.67740000  | 0.69250000  |
| C  | -1.71510000 | 0.49500000  | -2.35130000 |
| H  | -1.72010000 | 1.54960000  | -2.58920000 |
| H  | -1.10550000 | -0.17620000 | -2.94350000 |
| C  | -4.81460000 | 1.89680000  | 1.71890000  |
| H  | -5.56840000 | 1.22620000  | 1.29190000  |
| H  | -4.06500000 | 1.31280000  | 2.26260000  |

|    |             |             |             |
|----|-------------|-------------|-------------|
| H  | -5.29330000 | 2.61420000  | 2.38590000  |
| C  | 4.45780000  | 0.12570000  | -0.01870000 |
| C  | 5.67010000  | 0.72780000  | 0.36840000  |
| C  | 4.48710000  | -1.11710000 | -0.68070000 |
| C  | 6.88200000  | 0.09330000  | 0.11290000  |
| H  | 5.65310000  | 1.67290000  | 0.90090000  |
| C  | 5.70440000  | -1.73870000 | -0.94370000 |
| H  | 3.56220000  | -1.57790000 | -1.01440000 |
| C  | 6.90190000  | -1.13890000 | -0.54570000 |
| H  | 7.81080000  | 0.55680000  | 0.43230000  |
| H  | 5.71720000  | -2.69140000 | -1.46460000 |
| H  | 7.84920000  | -1.63030000 | -0.74900000 |
| O  | 3.17790000  | 2.13390000  | 0.33410000  |
| Si | 3.54790000  | 3.27980000  | -0.86320000 |
| H  | 2.99220000  | 4.54500000  | -0.34430000 |
| H  | 5.01400000  | 3.39790000  | -1.04550000 |
| H  | 2.90740000  | 2.86500000  | -2.13260000 |
| F  | -0.94050000 | 2.06770000  | 1.46510000  |
| F  | 0.45940000  | 2.73680000  | -0.05510000 |
| F  | 1.10690000  | 2.48560000  | 2.02310000  |

### **TS10**

|   |             |             |            |
|---|-------------|-------------|------------|
| C | -3.47090000 | -0.77090000 | 0.26490000 |
| C | -2.23820000 | -0.16100000 | 0.37440000 |
| H | -2.23390000 | 0.91930000  | 0.43570000 |
| C | -0.93980000 | -0.72910000 | 0.37850000 |

|    |             |             |             |
|----|-------------|-------------|-------------|
| C  | -0.65070000 | -2.24800000 | 0.29370000  |
| O  | 0.09450000  | -0.02350000 | 0.42720000  |
| Ti | 0.82720000  | 1.88450000  | 0.24840000  |
| Cl | 1.98600000  | 4.01440000  | -0.14290000 |
| Cl | 1.82110000  | 1.40820000  | 2.26310000  |
| Cl | -0.81730000 | 3.09150000  | 1.25540000  |
| O  | 2.53990000  | 1.51400000  | -0.73020000 |
| Si | 3.80830000  | 2.93190000  | -1.16340000 |
| C  | 2.88150000  | 0.18690000  | -1.08560000 |
| C  | 3.66330000  | -0.47890000 | -0.05270000 |
| H  | 4.01850000  | 0.15800000  | 0.74400000  |
| C  | 3.90990000  | -1.80450000 | 0.03380000  |
| O  | 3.50010000  | -2.69770000 | -0.88350000 |
| Si | 3.53470000  | -4.37860000 | -0.66860000 |
| Cl | -0.33080000 | 1.88330000  | -1.76610000 |
| H  | 2.81820000  | -4.87540000 | -1.86580000 |
| H  | 4.92140000  | -4.90390000 | -0.66090000 |
| H  | 2.81890000  | -4.79580000 | 0.56080000  |
| H  | 4.75370000  | 2.57150000  | -0.08140000 |
| H  | 4.03810000  | 2.20130000  | -2.43930000 |
| H  | 4.18790000  | 4.32170000  | -1.56830000 |
| O  | 4.58860000  | -2.42500000 | 1.03000000  |
| C  | 2.48370000  | -0.25620000 | -2.28950000 |
| H  | 2.75080000  | -1.24890000 | -2.62560000 |
| H  | 1.88680000  | 0.37510000  | -2.93540000 |

|    |             |             |             |
|----|-------------|-------------|-------------|
| C  | 5.01520000  | -1.65480000 | 2.15530000  |
| H  | 5.75320000  | -0.90410000 | 1.85100000  |
| H  | 4.16170000  | -1.16210000 | 2.63280000  |
| H  | 5.47390000  | -2.36650000 | 2.84230000  |
| C  | -4.69540000 | 0.03220000  | 0.11200000  |
| C  | -5.91050000 | -0.42420000 | 0.65800000  |
| C  | -4.66510000 | 1.26670000  | -0.56640000 |
| C  | -7.06620000 | 0.34090000  | 0.53440000  |
| H  | -5.93410000 | -1.35580000 | 1.21340000  |
| C  | -5.82780000 | 2.01990000  | -0.69530000 |
| H  | -3.74090000 | 1.61840000  | -1.01440000 |
| C  | -7.02780000 | 1.56140000  | -0.14490000 |
| H  | -7.99460000 | -0.00980000 | 0.97530000  |
| H  | -5.79730000 | 2.96490000  | -1.22900000 |
| H  | -7.93170000 | 2.15580000  | -0.24340000 |
| O  | -3.59350000 | -2.09730000 | 0.34940000  |
| Si | -4.36530000 | -3.22750000 | -0.66410000 |
| H  | -3.60440000 | -4.47810000 | -0.48060000 |
| H  | -5.77120000 | -3.41990000 | -0.23890000 |
| H  | -4.30270000 | -2.73100000 | -2.05760000 |
| F  | 0.66350000  | -2.47800000 | 0.27020000  |
| F  | -1.17700000 | -2.76000000 | -0.84270000 |
| F  | -1.17160000 | -2.90190000 | 1.34350000  |

**Int18**

|    |             |             |             |
|----|-------------|-------------|-------------|
| C  | 4.46310000  | 0.43120000  | -0.06170000 |
| C  | 3.11970000  | 0.26390000  | 0.16790000  |
| H  | 2.80810000  | -0.70860000 | 0.52390000  |
| C  | 2.03550000  | 1.18260000  | 0.00830000  |
| C  | 2.20740000  | 2.61930000  | -0.55000000 |
| O  | 0.86080000  | 0.88740000  | 0.28290000  |
| Ti | -0.40490000 | -0.74730000 | 1.06850000  |
| Cl | -5.13060000 | -2.40870000 | -2.90200000 |
| Cl | 0.80390000  | -0.39750000 | 2.94670000  |
| Cl | -1.56640000 | -2.51260000 | 1.86440000  |
| O  | -1.71940000 | 0.34060000  | 0.79170000  |
| Si | -3.08780000 | -2.31380000 | -2.44260000 |
| C  | -2.84490000 | 1.12120000  | 0.61900000  |
| C  | -4.06570000 | 0.34270000  | 0.79020000  |
| H  | -3.91790000 | -0.69120000 | 1.07160000  |
| C  | -5.33000000 | 0.79820000  | 0.63660000  |
| O  | -5.62130000 | 2.06790000  | 0.31100000  |
| Si | -7.19280000 | 2.65580000  | 0.04590000  |
| Cl | 0.35510000  | -1.83300000 | -0.79720000 |
| H  | -6.94970000 | 4.07320000  | -0.30670000 |
| H  | -7.85610000 | 1.95670000  | -1.07990000 |
| H  | -8.02110000 | 2.57570000  | 1.27280000  |
| H  | -2.68000000 | -0.89420000 | -2.50150000 |

|    |             |             |             |
|----|-------------|-------------|-------------|
| H  | -2.91450000 | -2.88440000 | -1.09220000 |
| H  | -2.36700000 | -3.11280000 | -3.46070000 |
| O  | -6.46180000 | 0.07350000  | 0.78820000  |
| C  | -2.64550000 | 2.41840000  | 0.32520000  |
| H  | -3.48330000 | 3.08440000  | 0.17700000  |
| H  | -1.63640000 | 2.80020000  | 0.22630000  |
| C  | -6.36020000 | -1.32630000 | 1.06150000  |
| H  | -5.83720000 | -1.83860000 | 0.24730000  |
| H  | -5.84030000 | -1.49780000 | 2.01020000  |
| H  | -7.38680000 | -1.68650000 | 1.12940000  |
| C  | 5.40100000  | -0.70240000 | 0.05930000  |
| C  | 6.70320000  | -0.48920000 | 0.54820000  |
| C  | 5.00630000  | -2.00540000 | -0.29770000 |
| C  | 7.58570000  | -1.55740000 | 0.68460000  |
| H  | 7.00460000  | 0.50670000  | 0.85530000  |
| C  | 5.89730000  | -3.06680000 | -0.16870000 |
| H  | 4.01300000  | -2.17810000 | -0.70040000 |
| C  | 7.18630000  | -2.84630000 | 0.32380000  |
| H  | 8.58250000  | -1.38520000 | 1.07980000  |
| H  | 5.58640000  | -4.06640000 | -0.45710000 |
| H  | 7.87760000  | -3.67780000 | 0.42700000  |
| O  | 4.97620000  | 1.63790000  | -0.33300000 |
| Si | 5.98950000  | 2.15590000  | -1.59560000 |
| H  | 5.67740000  | 3.58770000  | -1.76920000 |
| H  | 7.41230000  | 1.98840000  | -1.21690000 |

|   |            |            |             |
|---|------------|------------|-------------|
| H | 5.68270000 | 1.36610000 | -2.81090000 |
| F | 1.01930000 | 3.20700000 | -0.71130000 |
| F | 2.81210000 | 2.58790000 | -1.76120000 |
| F | 2.94050000 | 3.37980000 | 0.27830000  |

### **Int18'**

|    |             |             |             |
|----|-------------|-------------|-------------|
| C  | 2.90340000  | 0.42080000  | 0.42410000  |
| C  | 1.75060000  | -0.31490000 | 0.51890000  |
| H  | 1.81310000  | -1.36370000 | 0.25720000  |
| C  | 0.43850000  | 0.06930000  | 0.95390000  |
| C  | 0.07630000  | 1.51210000  | 1.40360000  |
| O  | -0.50210000 | -0.73640000 | 1.02180000  |
| Ti | -1.48810000 | -2.53270000 | 0.10650000  |
| Cl | -2.58360000 | -4.22870000 | -0.87000000 |
| Cl | -2.88250000 | -2.28940000 | 1.84480000  |
| O  | -1.57000000 | -1.38700000 | -1.23630000 |
| C  | -1.74650000 | -0.08560000 | -1.63840000 |
| C  | -2.98010000 | 0.49760000  | -1.11990000 |
| H  | -3.72340000 | -0.21140000 | -0.78100000 |
| C  | -3.22700000 | 1.81560000  | -0.95510000 |
| O  | -2.37230000 | 2.77990000  | -1.33250000 |
| Si | -2.45740000 | 4.39100000  | -0.80640000 |
| Cl | 0.46790000  | -3.62930000 | 0.40020000  |
| H  | -1.20250000 | 4.97400000  | -1.33380000 |



|    |             |             |             |
|----|-------------|-------------|-------------|
| H  | -3.62000000 | 5.09820000  | -1.39510000 |
| H  | -2.48610000 | 4.48480000  | 0.67200000  |
| O  | -4.33620000 | 2.35190000  | -0.39520000 |
| C  | -0.79660000 | 0.46370000  | -2.41940000 |
| H  | -0.90030000 | 1.47480000  | -2.78750000 |
| H  | 0.07540000  | -0.11370000 | -2.70390000 |
| C  | -5.30770000 | 1.47800000  | 0.18540000  |
| H  | -4.84990000 | 0.85000000  | 0.95690000  |
| H  | -6.06190000 | 2.12930000  | 0.62760000  |
| H  | -5.76680000 | 0.84720000  | -0.58360000 |
| C  | 4.14760000  | -0.16950000 | -0.11070000 |
| C  | 5.39350000  | 0.24370000  | 0.39660000  |
| C  | 4.11190000  | -1.15470000 | -1.11490000 |
| C  | 6.57200000  | -0.32090000 | -0.08410000 |
| H  | 5.43010000  | 0.98050000  | 1.19180000  |
| C  | 5.29360000  | -1.70900000 | -1.59760000 |
| H  | 3.15990000  | -1.46760000 | -1.53160000 |
| C  | 6.52530000  | -1.29530000 | -1.08350000 |
| H  | 7.52660000  | -0.00540000 | 0.32670000  |
| H  | 5.25320000  | -2.46190000 | -2.37910000 |
| H  | 7.44570000  | -1.73200000 | -1.46050000 |
| O  | 2.96800000  | 1.68170000  | 0.88150000  |
| Si | 3.43020000  | 3.11270000  | 0.09520000  |
| H  | 2.71870000  | 4.19020000  | 0.81040000  |
| H  | 4.89450000  | 3.31650000  | 0.20510000  |

|   |             |            |             |
|---|-------------|------------|-------------|
| H | 3.03190000  | 3.03070000 | -1.32960000 |
| F | 0.75650000  | 1.86550000 | 2.50640000  |
| F | 0.35190000  | 2.40750000 | 0.42240000  |
| F | -1.22810000 | 1.60780000 | 1.67230000  |

## TS11

|    |             |             |             |
|----|-------------|-------------|-------------|
| C  | 2.79140000  | 0.40540000  | 0.31730000  |
| C  | 1.68770000  | -0.38590000 | 0.24180000  |
| H  | 1.83030000  | -1.38600000 | -0.15080000 |
| C  | 0.31520000  | -0.16630000 | 0.67570000  |
| C  | -0.10360000 | 1.06800000  | 1.51240000  |
| O  | -0.41320000 | -1.19550000 | 0.90610000  |
| Ti | -1.47390000 | -2.65900000 | 0.04870000  |
| Cl | -2.82940000 | -4.05020000 | -1.11030000 |
| Cl | -2.31780000 | -3.14810000 | 2.06360000  |
| O  | -2.05870000 | -1.22000000 | -0.96710000 |
| C  | -1.84790000 | 0.08360000  | -1.10520000 |
| C  | -3.01520000 | 0.88800000  | -0.84470000 |
| H  | -3.90230000 | 0.32340000  | -0.59300000 |
| C  | -3.09160000 | 2.24730000  | -0.85300000 |
| O  | -2.06190000 | 3.03880000  | -1.14840000 |
| Si | -1.99800000 | 4.71570000  | -0.84150000 |
| Cl | 0.42930000  | -3.71790000 | -0.53840000 |
| H  | -0.59790000 | 5.05030000  | -1.17890000 |

|    |             |             |             |
|----|-------------|-------------|-------------|
| H  | -2.93080000 | 5.45390000  | -1.72380000 |
| H  | -2.28060000 | 4.99530000  | 0.58460000  |
| O  | -4.19010000 | 2.96650000  | -0.56250000 |
| C  | -0.54980000 | 0.48740000  | -1.38970000 |
| H  | -0.31260000 | 1.52980000  | -1.54200000 |
| H  | 0.10240000  | -0.25000000 | -1.83970000 |
| C  | -5.39700000 | 2.29560000  | -0.17720000 |
| H  | -5.23250000 | 1.69940000  | 0.72580000  |
| H  | -6.11810000 | 3.08790000  | 0.02180000  |
| H  | -5.75620000 | 1.65710000  | -0.99030000 |
| C  | 4.10920000  | -0.05310000 | -0.17690000 |
| C  | 5.28320000  | 0.34040000  | 0.49000000  |
| C  | 4.21650000  | -0.89110000 | -1.30120000 |
| C  | 6.52820000  | -0.10260000 | 0.05040000  |
| H  | 5.21020000  | 0.97030000  | 1.37040000  |
| C  | 5.46360000  | -1.32830000 | -1.73980000 |
| H  | 3.32240000  | -1.18430000 | -1.84250000 |
| C  | 6.62270000  | -0.93690000 | -1.06550000 |
| H  | 7.42540000  | 0.19860000  | 0.58380000  |
| H  | 5.53040000  | -1.97080000 | -2.61310000 |
| H  | 7.59460000  | -1.27970000 | -1.40910000 |
| O  | 2.76250000  | 1.60970000  | 0.94270000  |
| Si | 3.09050000  | 3.13820000  | 0.31130000  |
| H  | 2.58180000  | 4.08670000  | 1.32400000  |
| H  | 4.54670000  | 3.34250000  | 0.11300000  |

|   |             |            |             |
|---|-------------|------------|-------------|
| H | 2.39210000  | 3.30930000 | -0.98790000 |
| F | 0.57340000  | 1.08210000 | 2.67400000  |
| F | 0.12090000  | 2.25190000 | 0.89040000  |
| F | -1.41170000 | 1.01930000 | 1.79920000  |

### Int19

|    |             |             |             |
|----|-------------|-------------|-------------|
| C  | -2.75140000 | -0.34040000 | 0.26190000  |
| C  | -1.64690000 | 0.27770000  | -0.12920000 |
| H  | -1.75180000 | 0.98000000  | -0.93420000 |
| C  | -0.21150000 | 0.24310000  | 0.35780000  |
| C  | 0.03030000  | -0.37750000 | 1.74190000  |
| O  | 0.20090000  | 1.56940000  | 0.46800000  |
| Ti | 1.44390000  | 2.69140000  | -0.06540000 |
| Cl | 1.51560000  | 2.98850000  | -2.31070000 |
| Cl | 3.17840000  | 3.17900000  | 1.28360000  |
| O  | 2.50350000  | 0.93430000  | -0.46680000 |
| C  | 2.13500000  | -0.23630000 | -0.57710000 |
| C  | 3.16040000  | -1.23080000 | -0.65240000 |
| H  | 4.14780000  | -0.82230000 | -0.61080000 |
| C  | 3.02420000  | -2.57960000 | -0.72060000 |
| O  | 1.88320000  | -3.20770000 | -0.77670000 |
| Si | 1.63090000  | -4.88900000 | -0.73810000 |
| Cl | 0.29390000  | 4.58530000  | 0.36090000  |
| H  | 0.17260000  | -5.00250000 | -0.77500000 |

|    |             |             |             |
|----|-------------|-------------|-------------|
| H  | 2.24120000  | -5.50580000 | -1.91910000 |
| H  | 2.18180000  | -5.43620000 | 0.50440000  |
| O  | 4.03180000  | -3.41970000 | -0.73950000 |
| C  | 0.64910000  | -0.49820000 | -0.69370000 |
| H  | 0.41290000  | -1.54540000 | -0.68590000 |
| H  | 0.37470000  | -0.10260000 | -1.66730000 |
| C  | 5.38330000  | -2.98410000 | -0.66450000 |
| H  | 5.55250000  | -2.44870000 | 0.25830000  |
| H  | 5.97290000  | -3.88500000 | -0.68590000 |
| H  | 5.62280000  | -2.36210000 | -1.51480000 |
| C  | -4.05900000 | -0.10850000 | -0.41880000 |
| C  | -5.20800000 | 0.07550000  | 0.34690000  |
| C  | -4.15830000 | -0.06600000 | -1.80480000 |
| C  | -6.42530000 | 0.31560000  | -0.26360000 |
| H  | -5.14130000 | 0.04690000  | 1.41870000  |
| C  | -5.37920000 | 0.17060000  | -2.41530000 |
| H  | -3.28410000 | -0.22910000 | -2.40820000 |
| C  | -6.51410000 | 0.36390000  | -1.64660000 |
| H  | -7.30250000 | 0.46920000  | 0.33860000  |
| H  | -5.44190000 | 0.19850000  | -3.48820000 |
| H  | -7.46150000 | 0.54850000  | -2.12010000 |
| O  | -2.79900000 | -1.16300000 | 1.33170000  |
| Si | -3.17170000 | -2.77760000 | 1.40960000  |
| H  | -2.73200000 | -3.23780000 | 2.73030000  |
| H  | -4.61610000 | -3.00370000 | 1.25480000  |

|   |             |             |            |
|---|-------------|-------------|------------|
| H | -2.45570000 | -3.50140000 | 0.34210000 |
| F | -0.71450000 | 0.15060000  | 2.67640000 |
| F | -0.16360000 | -1.69230000 | 1.72900000 |
| F | 1.29800000  | -0.20210000 | 2.09040000 |

## Int20

|    |             |             |             |
|----|-------------|-------------|-------------|
| C  | -1.58141200 | 0.55884500  | 1.75815800  |
| C  | -1.45794700 | -0.89033200 | 1.37804000  |
| C  | -0.46746400 | -1.78556800 | 2.05822300  |
| C  | -0.33349800 | 1.48381400  | 1.73784100  |
| O  | -0.67533800 | -2.95898900 | 2.28695200  |
| O  | 0.70249300  | -1.18423600 | 2.42152300  |
| O  | -2.65830000 | 1.04159100  | 2.05140400  |
| C  | -0.06023700 | 2.10586300  | 0.38806100  |
| C  | 0.72107100  | 1.59140800  | -0.57412600 |
| H  | 0.91611300  | 2.15550200  | -1.48123100 |
| C  | 1.33236000  | 0.24018100  | -0.49884000 |
| O  | 0.58439500  | -0.76093000 | -0.43676700 |
| Ti | -1.42839600 | -1.15549100 | -0.83823100 |
| C  | 1.63225400  | -2.03845000 | 3.10918600  |
| Cl | -1.47468600 | -3.32677900 | -1.05100400 |
| Cl | -0.85480000 | -0.31304400 | -2.87801600 |
| H  | 1.18431600  | -2.43667700 | 4.02274100  |
| H  | 1.93317500  | -2.87300200 | 2.47071400  |
| H  | 2.48898500  | -1.40588900 | 3.34544800  |

|    |             |             |             |
|----|-------------|-------------|-------------|
| H  | 0.53985000  | 0.92377000  | 2.06834000  |
| H  | -0.53717600 | 2.27916100  | 2.45805700  |
| Cl | -3.52470200 | -0.46566500 | -0.91192800 |
| H  | -2.43741400 | -1.35223400 | 1.52567700  |
| C  | 2.78360400  | 0.06918800  | -0.53357900 |
| C  | 3.63752000  | 1.18585200  | -0.45302600 |
| C  | 3.33189800  | -1.22456700 | -0.64612200 |
| C  | 5.01700300  | 1.01071000  | -0.48665100 |
| H  | 3.21822500  | 2.18229700  | -0.35412800 |
| C  | 4.71006300  | -1.39112200 | -0.68223700 |
| H  | 2.66469300  | -2.07717200 | -0.71303500 |
| C  | 5.55212900  | -0.27528800 | -0.60292400 |
| H  | 5.67450800  | 1.87219700  | -0.42246900 |
| H  | 5.13339000  | -2.38648000 | -0.77631900 |
| H  | 6.62978400  | -0.40982400 | -0.63309000 |
| C  | -0.70649200 | 3.45557600  | 0.14364200  |
| F  | -0.36881500 | 4.32982100  | 1.11815400  |
| F  | -0.33689600 | 4.00333100  | -1.03164600 |
| F  | -2.04469700 | 3.34088200  | 0.14323900  |

## **TS12**

|   |             |             |            |
|---|-------------|-------------|------------|
| C | 0.26690000  | 1.07100000  | 1.89610000 |
| C | -0.18360000 | -0.29010000 | 1.54300000 |
| C | 0.68280000  | -1.46850000 | 1.72160000 |
| C | 1.51540000  | 1.64460000  | 1.17710000 |

|    |             |             |             |
|----|-------------|-------------|-------------|
| O  | 0.31770000  | -2.62730000 | 1.61940000  |
| O  | 1.96970000  | -1.14960000 | 2.05130000  |
| O  | -0.36880000 | 1.80470000  | 2.63500000  |
| C  | 1.08740000  | 2.09780000  | -0.19230000 |
| C  | 0.54130000  | 1.30740000  | -1.12940000 |
| H  | 0.11430000  | 1.75150000  | -2.02650000 |
| C  | 0.37550000  | -0.16000000 | -1.07910000 |
| O  | -0.79910000 | -0.60730000 | -1.44770000 |
| Ti | -2.25700000 | -0.50060000 | -0.24870000 |
| C  | 2.82840000  | -2.26820000 | 2.32630000  |
| Cl | -2.86970000 | -2.30880000 | 0.83390000  |
| Cl | -3.70080000 | -0.57100000 | -1.93810000 |
| H  | 2.42470000  | -2.86530000 | 3.14770000  |
| H  | 2.93570000  | -2.90280000 | 1.44380000  |
| H  | 3.78930000  | -1.83410000 | 2.60610000  |
| H  | 2.29310000  | 0.88100000  | 1.11980000  |
| H  | 1.88200000  | 2.48680000  | 1.76520000  |
| Cl | -2.91700000 | 1.37410000  | 0.68600000  |
| H  | -1.14540000 | -0.49460000 | 2.01810000  |
| C  | 1.50000000  | -1.08300000 | -1.17670000 |
| C  | 2.82730000  | -0.60720000 | -1.25710000 |
| C  | 1.25220000  | -2.46820000 | -1.30130000 |
| C  | 3.87550000  | -1.49470000 | -1.46150000 |
| H  | 3.02230000  | 0.45730000  | -1.19480000 |
| C  | 2.30760000  | -3.34780000 | -1.50800000 |



|   |            |             |             |
|---|------------|-------------|-------------|
| H | 0.23680000 | -2.83720000 | -1.23290000 |
| C | 3.61740000 | -2.86460000 | -1.58860000 |
| H | 4.89230000 | -1.12150000 | -1.53650000 |
| H | 2.11030000 | -4.41080000 | -1.60470000 |
| H | 4.43910000 | -3.55540000 | -1.75700000 |
| C | 1.17450000 | 3.58450000  | -0.45070000 |
| F | 2.46630000 | 3.98320000  | -0.37060000 |
| F | 0.71830000 | 3.93590000  | -1.66870000 |
| F | 0.48000000 | 4.27790000  | 0.46720000  |

## INt21

|    |             |             |             |
|----|-------------|-------------|-------------|
| C  | -0.91150000 | 1.03420000  | -2.02070000 |
| C  | -1.01140000 | -0.39840000 | -1.47090000 |
| C  | -2.44910000 | -0.92110000 | -1.56800000 |
| C  | -1.31650000 | 2.17030000  | -1.09450000 |
| O  | -2.76350000 | -1.90980000 | -2.18400000 |
| O  | -3.31860000 | -0.13220000 | -0.90210000 |
| O  | -0.54820000 | 1.23620000  | -3.15790000 |
| C  | -1.15700000 | 1.85300000  | 0.36850000  |
| C  | -0.78430000 | 0.66580000  | 0.84920000  |
| H  | -0.65830000 | 0.52080000  | 1.91660000  |
| C  | -0.41200000 | -0.50500000 | -0.03250000 |
| O  | 1.02160000  | -0.40130000 | -0.22330000 |
| Ti | 2.70380000  | -0.01140000 | -0.11490000 |

|    |             |             |             |
|----|-------------|-------------|-------------|
| C  | -4.69570000 | -0.56170000 | -0.94390000 |
| Cl | 3.86290000  | -1.52250000 | -1.22950000 |
| Cl | 3.29230000  | -0.01960000 | 2.00740000  |
| H  | -5.04780000 | -0.60440000 | -1.97710000 |
| H  | -4.79430000 | -1.54940000 | -0.48780000 |
| H  | -5.24920000 | 0.18550000  | -0.37560000 |
| H  | -2.36710000 | 2.41710000  | -1.30210000 |
| H  | -0.73060000 | 3.05460000  | -1.36800000 |
| Cl | 3.04550000  | 1.99360000  | -0.96110000 |
| H  | -0.42690000 | -1.04390000 | -2.12810000 |
| C  | -0.71340000 | -1.86170000 | 0.60040000  |
| C  | -1.77030000 | -2.00470000 | 1.50810000  |
| C  | 0.02640000  | -2.99170000 | 0.22850000  |
| C  | -2.07510000 | -3.25760000 | 2.04310000  |
| H  | -2.36190000 | -1.14120000 | 1.79720000  |
| C  | -0.27740000 | -4.24020000 | 0.76840000  |
| H  | 0.84550000  | -2.89580000 | -0.47730000 |
| C  | -1.32800000 | -4.37700000 | 1.67780000  |
| H  | -2.89400000 | -3.35340000 | 2.75060000  |
| H  | 0.30890000  | -5.10680000 | 0.47660000  |
| H  | -1.56220000 | -5.35070000 | 2.09860000  |
| C  | -1.43200000 | 3.00040000  | 1.30630000  |
| F  | -2.68710000 | 3.47420000  | 1.12160000  |
| F  | -1.31160000 | 2.66370000  | 2.60360000  |
| F  | -0.58380000 | 4.02550000  | 1.06800000  |

## Int22

|    |             |             |             |
|----|-------------|-------------|-------------|
| C  | 3.23460000  | 1.24610000  | 0.34390000  |
| C  | 2.17370000  | 0.39550000  | 0.48640000  |
| H  | 2.39080000  | -0.66240000 | 0.44400000  |
| C  | 0.78550000  | 0.72590000  | 0.66170000  |
| C  | 0.27740000  | 2.13160000  | 0.83810000  |
| O  | -0.07590000 | -0.19170000 | 0.67730000  |
| Ti | -0.45720000 | -2.18360000 | 0.27760000  |
| Cl | -1.23960000 | -4.18330000 | -0.42010000 |
| Cl | -1.87550000 | -2.04290000 | 2.08690000  |
| Cl | 1.31900000  | -2.93100000 | 1.41650000  |
| O  | -2.32260000 | -1.23500000 | -0.89530000 |
| Si | -3.53850000 | -2.19270000 | -1.64490000 |
| C  | -2.49520000 | 0.17360000  | -0.99740000 |
| C  | -3.26150000 | 0.69520000  | 0.12770000  |
| H  | -3.36640000 | 0.01230000  | 0.95930000  |
| C  | -3.83200000 | 1.91670000  | 0.22490000  |
| O  | -3.74950000 | 2.85810000  | -0.73260000 |
| Si | -4.58720000 | 4.33330000  | -0.70210000 |
| Cl | 0.64400000  | -1.77400000 | -1.72070000 |
| H  | -4.20090000 | 4.95240000  | -1.99050000 |
| H  | -6.05500000 | 4.13030000  | -0.65260000 |
| H  | -4.14270000 | 5.19480000  | 0.42030000  |
| H  | -4.11880000 | -3.12900000 | -0.66100000 |

|   |             |             |             |
|---|-------------|-------------|-------------|
| H | -4.58070000 | -1.23980000 | -2.09960000 |
| H | -2.96900000 | -2.90180000 | -2.81050000 |
| H | 0.78840000  | 2.62850000  | 1.66820000  |
| H | 0.48470000  | 2.72160000  | -0.06170000 |
| H | -0.79870000 | 2.09970000  | 1.01190000  |
| O | -4.55930000 | 2.37140000  | 1.27520000  |
| C | -1.97550000 | 0.79870000  | -2.06190000 |
| H | -2.08460000 | 1.86870000  | -2.17920000 |
| H | -1.42990000 | 0.24010000  | -2.81270000 |
| C | -4.79660000 | 1.49590000  | 2.38000000  |
| H | -5.33940000 | 0.60220000  | 2.05420000  |
| H | -3.85270000 | 1.20050000  | 2.85030000  |
| H | -5.40310000 | 2.06730000  | 3.08310000  |
| C | 4.59570000  | 0.73290000  | 0.08070000  |
| C | 5.71400000  | 1.35260000  | 0.66740000  |
| C | 4.78710000  | -0.39080000 | -0.74350000 |
| C | 6.99490000  | 0.85620000  | 0.43640000  |
| H | 5.57510000  | 2.19390000  | 1.33960000  |
| C | 6.07110000  | -0.87660000 | -0.97610000 |
| H | 3.93210000  | -0.86440000 | -1.21650000 |
| C | 7.17630000  | -0.25630000 | -0.38830000 |
| H | 7.84980000  | 1.33130000  | 0.90880000  |
| H | 6.20820000  | -1.73920000 | -1.62150000 |
| H | 8.17600000  | -0.64050000 | -0.57000000 |
| O | 3.07980000  | 2.58040000  | 0.47480000  |

|    |            |            |             |
|----|------------|------------|-------------|
| Si | 3.77510000 | 3.86310000 | -0.39210000 |
| H  | 2.68370000 | 4.85410000 | -0.52540000 |
| H  | 4.89240000 | 4.45420000 | 0.38000000  |
| H  | 4.23500000 | 3.39290000 | -1.71870000 |

### TS13

|    |             |             |             |
|----|-------------|-------------|-------------|
| C  | 3.54020000  | 1.21880000  | 0.24050000  |
| C  | 2.37970000  | 0.50100000  | 0.36790000  |
| H  | 2.47010000  | -0.57430000 | 0.45740000  |
| C  | 1.03830000  | 0.99800000  | 0.38210000  |
| C  | 0.65960000  | 2.45200000  | 0.33690000  |
| O  | 0.08250000  | 0.17360000  | 0.43710000  |
| Ti | -0.54360000 | -1.70150000 | 0.15820000  |
| Cl | -1.67490000 | -3.83360000 | -0.35370000 |
| Cl | -1.45180000 | -1.49290000 | 2.27260000  |
| Cl | 1.20020000  | -2.92560000 | 0.96010000  |
| O  | -2.33860000 | -1.29820000 | -0.67380000 |
| Si | -3.61610000 | -2.72570000 | -1.06130000 |
| C  | -2.76470000 | 0.02810000  | -0.90760000 |
| C  | -3.50270000 | 0.57360000  | 0.22640000  |
| H  | -3.52690000 | -0.05950000 | 1.10140000  |
| C  | -4.13220000 | 1.76680000  | 0.29050000  |
| O  | -4.15330000 | 2.65800000  | -0.71920000 |
| Si | -5.04980000 | 4.09670000  | -0.70800000 |

|    |             |             |             |
|----|-------------|-------------|-------------|
| Cl | 0.46760000  | -1.52210000 | -1.92500000 |
| H  | -4.77410000 | 4.66150000  | -2.04920000 |
| H  | -6.50210000 | 3.84200000  | -0.55220000 |
| H  | -4.57300000 | 5.03700000  | 0.33550000  |
| H  | -4.42590000 | -2.50650000 | 0.15900000  |
| H  | -4.03410000 | -1.88870000 | -2.22010000 |
| H  | -4.00860000 | -4.08210000 | -1.55980000 |
| H  | 1.13030000  | 3.00200000  | 1.15750000  |
| H  | 1.01640000  | 2.90400000  | -0.59510000 |
| H  | -0.42640000 | 2.53800000  | 0.39340000  |
| O  | -4.82330000 | 2.24620000  | 1.35590000  |
| C  | -2.48100000 | 0.57590000  | -2.10000000 |
| H  | -2.80130000 | 1.58170000  | -2.33560000 |
| H  | -1.92910000 | 0.01120000  | -2.84070000 |
| C  | -4.94570000 | 1.42750000  | 2.52040000  |
| H  | -5.45570000 | 0.48840000  | 2.27990000  |
| H  | -3.96070000 | 1.21120000  | 2.94760000  |
| H  | -5.54170000 | 2.00680000  | 3.22620000  |
| C  | 4.85100000  | 0.54430000  | 0.15690000  |
| C  | 5.97720000  | 1.10010000  | 0.79130000  |
| C  | 4.98330000  | -0.67040000 | -0.53980000 |
| C  | 7.20870000  | 0.45270000  | 0.72920000  |
| H  | 5.87690000  | 2.01250000  | 1.37150000  |
| C  | 6.21990000  | -1.30700000 | -0.60530000 |
| H  | 4.12380000  | -1.09800000 | -1.04700000 |

|    |            |             |             |
|----|------------|-------------|-------------|
| C  | 7.33330000 | -0.74870000 | 0.02740000  |
| H  | 8.06810000 | 0.88010000  | 1.23760000  |
| H  | 6.31360000 | -2.23930000 | -1.15410000 |
| H  | 8.29530000 | -1.25060000 | -0.02280000 |
| O  | 3.51740000 | 2.56430000  | 0.22460000  |
| Si | 4.44770000 | 3.68920000  | -0.64800000 |
| H  | 3.48460000 | 4.75090000  | -1.01510000 |
| H  | 5.50570000 | 4.24940000  | 0.22320000  |
| H  | 5.02580000 | 3.04790000  | -1.85030000 |

### **Int23**

|    |             |             |             |
|----|-------------|-------------|-------------|
| C  | -4.03950000 | 0.79440000  | -0.35770000 |
| C  | -2.70230000 | 0.55750000  | -0.22290000 |
| H  | -2.40130000 | -0.47830000 | -0.14700000 |
| C  | -1.62300000 | 1.51530000  | -0.15880000 |
| C  | -1.82260000 | 2.99790000  | -0.34470000 |
| O  | -0.45270000 | 1.12670000  | 0.05980000  |
| Ti | 0.69320000  | -0.64130000 | 0.47070000  |
| Cl | 0.15170000  | -1.16620000 | -1.68120000 |
| Cl | 1.69740000  | -2.64060000 | 0.84970000  |
| O  | 2.10390000  | 0.36590000  | 0.63740000  |
| C  | 3.42080000  | 0.76700000  | 0.66650000  |
| C  | 4.27850000  | -0.09810000 | -0.13690000 |
| H  | 3.79510000  | -0.97640000 | -0.54040000 |
| C  | 5.59160000  | 0.08170000  | -0.39390000 |

|    |             |             |             |
|----|-------------|-------------|-------------|
| O  | 6.30570000  | 1.12510000  | 0.06410000  |
| Si | 7.94970000  | 1.38190000  | -0.26330000 |
| Cl | -0.64300000 | -0.77320000 | 2.31670000  |
| H  | 8.23100000  | 2.64330000  | 0.45970000  |
| H  | 8.79720000  | 0.29120000  | 0.27560000  |
| H  | 8.19980000  | 1.56550000  | -1.71350000 |
| H  | -2.31580000 | 3.20810000  | -1.29850000 |
| H  | -2.47100000 | 3.39840000  | 0.44230000  |
| H  | -0.85040000 | 3.49200000  | -0.30490000 |
| O  | 6.37460000  | -0.73960000 | -1.13620000 |
| C  | 3.71460000  | 1.85850000  | 1.39610000  |
| H  | 4.72900000  | 2.22520000  | 1.45850000  |
| H  | 2.92960000  | 2.37940000  | 1.93120000  |
| C  | 5.79390000  | -1.91190000 | -1.71010000 |
| H  | 5.40010000  | -2.57080000 | -0.92890000 |
| H  | 4.99110000  | -1.64400000 | -2.40570000 |
| H  | 6.60270000  | -2.40870000 | -2.24660000 |
| C  | -5.02390000 | -0.30970000 | -0.32990000 |
| C  | -6.13260000 | -0.29380000 | -1.19510000 |
| C  | -4.85490000 | -1.39470000 | 0.54820000  |
| C  | -7.04930000 | -1.34290000 | -1.18280000 |
| H  | -6.25120000 | 0.51880000  | -1.90540000 |
| C  | -5.77870000 | -2.43670000 | 0.56020000  |
| H  | -4.01360000 | -1.40530000 | 1.23470000  |
| C  | -6.87640000 | -2.41400000 | -0.30350000 |



|    |             |             |             |
|----|-------------|-------------|-------------|
| H  | -7.89280000 | -1.32860000 | -1.86710000 |
| H  | -5.64320000 | -3.26510000 | 1.24930000  |
| H  | -7.59380000 | -3.22960000 | -0.29300000 |
| O  | -4.50750000 | 2.04530000  | -0.56300000 |
| Si | -5.89250000 | 2.81570000  | 0.04060000  |
| H  | -5.45870000 | 4.20650000  | 0.30320000  |
| H  | -6.96550000 | 2.81340000  | -0.98080000 |
| H  | -6.34540000 | 2.15480000  | 1.28640000  |

#### **Int24**

|    |             |             |             |
|----|-------------|-------------|-------------|
| C  | -2.62080000 | -0.54650000 | -0.43000000 |
| C  | -1.45250000 | -1.18190000 | -0.24750000 |
| H  | -1.48110000 | -2.16640000 | 0.20620000  |
| C  | -0.06360000 | -0.71470000 | -0.65190000 |
| C  | 0.05940000  | -0.52950000 | -2.17390000 |
| O  | 0.82500000  | -1.76910000 | -0.26270000 |
| Ti | 2.52960000  | -2.05110000 | 0.08080000  |
| Cl | 3.18880000  | -1.53230000 | 2.18600000  |
| Cl | 3.92400000  | -2.07370000 | -1.69070000 |
| O  | 2.65860000  | 0.09330000  | -0.18730000 |
| C  | 1.77420000  | 0.97510000  | -0.06560000 |
| C  | 2.22140000  | 2.34020000  | -0.12080000 |
| H  | 3.27630000  | 2.43830000  | -0.34150000 |
| C  | 1.51660000  | 3.48190000  | 0.14520000  |
| O  | 0.23990000  | 3.51150000  | 0.51140000  |

|    |             |             |             |
|----|-------------|-------------|-------------|
| Si | -0.60220000 | 4.93240000  | 0.97880000  |
| Cl | 2.43610000  | -4.28250000 | 0.38780000  |
| H  | -1.92360000 | 4.40080000  | 1.36660000  |
| H  | 0.07270000  | 5.56720000  | 2.13250000  |
| H  | -0.71980000 | 5.86780000  | -0.16210000 |
| H  | 1.08220000  | -0.25500000 | -2.45000000 |
| H  | -0.18920000 | -1.46980000 | -2.67320000 |
| H  | -0.63310000 | 0.24300000  | -2.51740000 |
| O  | 2.02970000  | 4.71950000  | 0.09390000  |
| C  | 0.32900000  | 0.56460000  | 0.13220000  |
| H  | -0.34620000 | 1.37370000  | -0.14000000 |
| H  | 0.18890000  | 0.36970000  | 1.20450000  |
| C  | 3.39980000  | 4.92370000  | -0.28670000 |
| H  | 3.57800000  | 4.53360000  | -1.29290000 |
| H  | 3.54340000  | 6.00350000  | -0.27030000 |
| H  | 4.07050000  | 4.44320000  | 0.43140000  |
| C  | -3.92230000 | -1.11990000 | -0.00210000 |
| C  | -5.03770000 | -1.07640000 | -0.85660000 |
| C  | -4.05800000 | -1.73360000 | 1.25400000  |
| C  | -6.25350000 | -1.63510000 | -0.46400000 |
| H  | -4.94110000 | -0.63210000 | -1.84270000 |
| C  | -5.27300000 | -2.29570000 | 1.64140000  |
| H  | -3.20770000 | -1.75420000 | 1.92920000  |
| C  | -6.37530000 | -2.24610000 | 0.78540000  |
| H  | -7.10310000 | -1.60280000 | -1.14060000 |

|    |             |             |             |
|----|-------------|-------------|-------------|
| H  | -5.36120000 | -2.76420000 | 2.61770000  |
| H  | -7.32320000 | -2.68070000 | 1.09020000  |
| O  | -2.65690000 | 0.66500000  | -1.09690000 |
| Si | -3.62430000 | 2.00000000  | -0.78110000 |
| H  | -2.83590000 | 3.15450000  | -1.27910000 |
| H  | -4.91040000 | 1.95380000  | -1.51840000 |
| H  | -3.88260000 | 2.15100000  | 0.67380000  |

#### **TS14**

|    |             |             |             |
|----|-------------|-------------|-------------|
| C  | 2.67700000  | 0.36980000  | 0.53870000  |
| C  | 1.61660000  | -0.47340000 | 0.56590000  |
| H  | 1.79170000  | -1.49330000 | 0.24290000  |
| C  | 0.23340000  | -0.23250000 | 0.99650000  |
| C  | -0.11710000 | 0.85050000  | 1.99360000  |
| O  | -0.51720000 | -1.29650000 | 1.05830000  |
| Ti | -1.62860000 | -2.50750000 | 0.03790000  |
| Cl | -3.04250000 | -3.58630000 | -1.38400000 |
| Cl | -2.55650000 | -3.30530000 | 1.91920000  |
| O  | -2.20840000 | -0.88100000 | -0.71620000 |
| C  | -1.82530000 | 0.38150000  | -0.69310000 |
| C  | -2.87220000 | 1.29830000  | -0.30290000 |
| H  | -3.80250000 | 0.82120000  | -0.02520000 |
| C  | -2.82340000 | 2.65910000  | -0.30610000 |
| O  | -1.73990000 | 3.36430000  | -0.63830000 |
| Si | -1.68670000 | 5.06790000  | -0.74680000 |

|    |             |             |             |
|----|-------------|-------------|-------------|
| Cl | 0.20520000  | -3.59980000 | -0.72280000 |
| H  | -0.29850000 | 5.31180000  | -1.19420000 |
| H  | -2.65440000 | 5.56390000  | -1.75190000 |
| H  | -1.92220000 | 5.69100000  | 0.57570000  |
| H  | -1.20210000 | 0.95660000  | 2.05730000  |
| H  | 0.25310000  | 0.53370000  | 2.97760000  |
| H  | 0.34660000  | 1.80380000  | 1.74730000  |
| O  | -3.84350000 | 3.47340000  | 0.02350000  |
| C  | -0.48100000 | 0.65940000  | -0.92420000 |
| H  | -0.12900000 | 1.68160000  | -0.93960000 |
| H  | 0.07560000  | -0.06790000 | -1.50200000 |
| C  | -5.11410000 | 2.91390000  | 0.38090000  |
| H  | -5.02000000 | 2.29270000  | 1.27710000  |
| H  | -5.76010000 | 3.76770000  | 0.58330000  |
| H  | -5.51850000 | 2.32230000  | -0.44610000 |
| C  | 4.01870000  | -0.07120000 | 0.09190000  |
| C  | 5.17220000  | 0.41030000  | 0.73730000  |
| C  | 4.16740000  | -0.98530000 | -0.96640000 |
| C  | 6.43760000  | -0.01490000 | 0.33670000  |
| H  | 5.07200000  | 1.09080000  | 1.57690000  |
| C  | 5.43380000  | -1.40690000 | -1.36320000 |
| H  | 3.28830000  | -1.35100000 | -1.48790000 |
| C  | 6.57280000  | -0.92290000 | -0.71500000 |
| H  | 7.31800000  | 0.35640000  | 0.85390000  |
| H  | 5.53130000  | -2.10930000 | -2.18610000 |

|    |            |             |             |
|----|------------|-------------|-------------|
| H  | 7.55960000 | -1.25230000 | -1.02790000 |
| O  | 2.56530000 | 1.66070000  | 0.97810000  |
| Si | 3.12870000 | 3.07060000  | 0.24670000  |
| H  | 2.13230000 | 4.10660000  | 0.61070000  |
| H  | 4.45490000 | 3.47030000  | 0.77540000  |
| H  | 3.19140000 | 2.90340000  | -1.22640000 |

**Int23'**

|    |             |             |             |
|----|-------------|-------------|-------------|
| C  | 3.23650000  | 0.00490000  | 0.41770000  |
| C  | 2.09900000  | -0.73250000 | 0.26240000  |
| H  | 1.44280000  | -0.45640000 | -0.55200000 |
| C  | 1.64980000  | -1.86090000 | 1.05000000  |
| C  | 2.45100000  | -2.44710000 | 2.18560000  |
| O  | 0.55220000  | -2.40500000 | 0.79610000  |
| Ti | -1.13350000 | -2.29670000 | -0.55630000 |
| Cl | -2.89280000 | -2.42100000 | -1.95880000 |
| Cl | -2.26960000 | -3.07270000 | 1.24420000  |
| O  | -1.00380000 | -0.53750000 | -0.57150000 |
| C  | -1.60620000 | 0.69900000  | -0.62530000 |
| C  | -2.61990000 | 0.86050000  | 0.41150000  |
| H  | -2.79560000 | -0.01530000 | 1.02110000  |
| C  | -3.36610000 | 1.96130000  | 0.65070000  |
| O  | -3.23320000 | 3.11310000  | -0.02860000 |
| Si | -4.22780000 | 4.47270000  | 0.18270000  |
| Cl | 0.29350000  | -3.39960000 | -1.93270000 |

|   |             |             |             |
|---|-------------|-------------|-------------|
| H | -3.69230000 | 5.42150000  | -0.82010000 |
| H | -5.64750000 | 4.16550000  | -0.11170000 |
| H | -4.08840000 | 5.04740000  | 1.54240000  |
| H | 1.90640000  | -3.29910000 | 2.59550000  |
| H | 3.43960000  | -2.76250000 | 1.83740000  |
| H | 2.61610000  | -1.70050000 | 2.96970000  |
| O | -4.33600000 | 2.07270000  | 1.58980000  |
| C | -1.19030000 | 1.55500000  | -1.57910000 |
| H | -1.63020000 | 2.53760000  | -1.67130000 |
| H | -0.44020000 | 1.24310000  | -2.29660000 |
| C | -4.68520000 | 0.92170000  | 2.36260000  |
| H | -3.83880000 | 0.59810000  | 2.97820000  |
| H | -5.51080000 | 1.23590000  | 3.00150000  |
| H | -5.00210000 | 0.10090000  | 1.71080000  |
| C | 3.54100000  | 1.16120000  | -0.45500000 |
| C | 4.86100000  | 1.39530000  | -0.88060000 |
| C | 2.52040000  | 2.02840000  | -0.88210000 |
| C | 5.15180000  | 2.47210000  | -1.71570000 |
| H | 5.65080000  | 0.70870000  | -0.59160000 |
| C | 2.81910000  | 3.10670000  | -1.71170000 |
| H | 1.49760000  | 1.86830000  | -0.55410000 |
| C | 4.13280000  | 3.33250000  | -2.12940000 |
| H | 6.17240000  | 2.63270000  | -2.05100000 |
| H | 2.02280000  | 3.77420000  | -2.02790000 |
| H | 4.36110000  | 4.17370000  | -2.77780000 |

|    |            |             |            |
|----|------------|-------------|------------|
| O  | 4.15900000 | -0.32830000 | 1.34910000 |
| Si | 5.09330000 | 0.64840000  | 2.37140000 |
| H  | 5.13640000 | -0.08910000 | 3.65440000 |
| H  | 6.46570000 | 0.79250000  | 1.83320000 |
| H  | 4.45090000 | 1.97260000  | 2.54330000 |

### **Int25**

|    |             |             |             |
|----|-------------|-------------|-------------|
| C  | 2.74650000  | -1.51420000 | 0.20180000  |
| C  | 2.92490000  | -0.91310000 | 1.53760000  |
| H  | 3.47380000  | -1.52930000 | 2.24630000  |
| C  | 2.54040000  | 0.31680000  | 1.94470000  |
| O  | -2.42210000 | -1.24420000 | -0.00600000 |
| Ti | -4.12850000 | -1.23010000 | 0.09930000  |
| O  | 3.97410000  | 2.51830000  | 1.06790000  |
| C  | 2.79350000  | 2.52810000  | 0.72790000  |
| C  | 2.27360000  | 3.67040000  | -0.02340000 |
| H  | 3.02990000  | 4.41750000  | -0.22760000 |
| C  | 1.01060000  | 3.89610000  | -0.47090000 |
| O  | -0.01600000 | 3.06400000  | -0.27710000 |
| Si | -1.61100000 | 3.32640000  | -0.83440000 |
| H  | -2.31830000 | 2.13210000  | -0.33440000 |
| H  | -2.17670000 | 4.55920000  | -0.23840000 |
| H  | -1.64600000 | 3.38650000  | -2.31350000 |
| O  | 0.61190000  | 4.98400000  | -1.16390000 |
| C  | 1.87340000  | 1.33780000  | 1.05670000  |

|    |             |             |             |
|----|-------------|-------------|-------------|
| C  | 1.56090000  | 6.00310000  | -1.48970000 |
| H  | 2.36590000  | 5.59570000  | -2.10980000 |
| H  | 1.00190000  | 6.75410000  | -2.04790000 |
| H  | 1.97860000  | 6.44570000  | -0.57960000 |
| C  | 3.83570000  | -2.38890000 | -0.32400000 |
| C  | 3.55220000  | -3.24370000 | -1.40260000 |
| C  | 5.13600000  | -2.36160000 | 0.20620000  |
| C  | 4.54270000  | -4.06800000 | -1.92610000 |
| H  | 2.54750000  | -3.24780000 | -1.81180000 |
| C  | 6.12970000  | -3.18050000 | -0.32710000 |
| H  | 5.37740000  | -1.68080000 | 1.01630000  |
| C  | 5.83330000  | -4.03840000 | -1.38830000 |
| H  | 4.31300000  | -4.73350000 | -2.75350000 |
| H  | 7.13530000  | -3.14640000 | 0.08240000  |
| H  | 6.60760000  | -4.68070000 | -1.79920000 |
| O  | 1.72620000  | -1.35290000 | -0.48910000 |
| Si | -0.68560000 | -1.26670000 | -0.16030000 |
| H  | 1.54190000  | 0.89480000  | 0.11560000  |
| H  | 0.96630000  | 1.71640000  | 1.54380000  |
| C  | 2.82120000  | 0.76290000  | 3.35450000  |
| H  | 3.51490000  | 1.61050000  | 3.34090000  |
| H  | 1.89660000  | 1.10470000  | 3.83860000  |
| H  | 3.25350000  | -0.03790000 | 3.96130000  |
| Cl | -4.71980000 | -0.43090000 | 2.07990000  |
| Cl | -4.93360000 | 0.07200000  | -1.50670000 |



|    |             |             |             |
|----|-------------|-------------|-------------|
| Cl | -4.88490000 | -3.29500000 | -0.14660000 |
| H  | -0.46510000 | -0.21330000 | -1.16800000 |
| H  | -0.26490000 | -0.95060000 | 1.21830000  |
| H  | -0.44330000 | -2.65130000 | -0.60890000 |

### TS15

|    |             |             |             |
|----|-------------|-------------|-------------|
| C  | 2.52940000  | -0.56710000 | 0.04850000  |
| C  | 1.91100000  | -0.19580000 | -1.13090000 |
| H  | 2.56930000  | 0.10320000  | -1.93850000 |
| C  | 0.52870000  | -0.11300000 | -1.41880000 |
| O  | 0.00300000  | 1.65030000  | -0.30510000 |
| Ti | -1.07810000 | 2.88910000  | -0.17670000 |
| O  | 0.11920000  | -2.66320000 | -2.32750000 |
| C  | -0.64550000 | -2.33330000 | -1.42370000 |
| C  | -1.69080000 | -3.25000000 | -0.98350000 |
| H  | -1.69040000 | -4.18400000 | -1.53020000 |
| C  | -2.63500000 | -3.06150000 | -0.02130000 |
| O  | -2.71650000 | -1.96880000 | 0.73580000  |
| Si | -3.98440000 | -1.59630000 | 1.82270000  |
| H  | -3.60490000 | -0.26120000 | 2.32180000  |
| H  | -5.28230000 | -1.56590000 | 1.11090000  |
| H  | -4.01600000 | -2.58050000 | 2.93090000  |
| O  | -3.60250000 | -3.94270000 | 0.30020000  |
| C  | -0.51510000 | -0.95330000 | -0.73730000 |
| C  | -3.71640000 | -5.16800000 | -0.43030000 |

|    |             |             |             |
|----|-------------|-------------|-------------|
| H  | -2.81800000 | -5.77970000 | -0.29880000 |
| H  | -4.58080000 | -5.67950000 | -0.00720000 |
| H  | -3.88030000 | -4.96800000 | -1.49400000 |
| C  | 3.97770000  | -0.83070000 | 0.13540000  |
| C  | 4.59760000  | -0.91390000 | 1.39670000  |
| C  | 4.76610000  | -1.02320000 | -1.01730000 |
| C  | 5.96520000  | -1.15010000 | 1.50110000  |
| H  | 4.00180000  | -0.79920000 | 2.29460000  |
| C  | 6.13100000  | -1.26270000 | -0.90840000 |
| H  | 4.30830000  | -1.01300000 | -2.00030000 |
| C  | 6.73680000  | -1.32050000 | 0.35020000  |
| H  | 6.42850000  | -1.20340000 | 2.48200000  |
| H  | 6.72320000  | -1.41280000 | -1.80630000 |
| H  | 7.80400000  | -1.50630000 | 0.43200000  |
| O  | 1.85620000  | -0.70150000 | 1.19470000  |
| Si | 1.23450000  | 0.45290000  | 2.29760000  |
| H  | -0.28840000 | -1.12060000 | 0.31430000  |
| H  | -1.47930000 | -0.44020000 | -0.77470000 |
| C  | 0.16130000  | 0.40410000  | -2.77490000 |
| H  | 0.27730000  | -0.43690000 | -3.47280000 |
| H  | -0.87940000 | 0.73300000  | -2.80800000 |
| H  | 0.81480000  | 1.22090000  | -3.09080000 |
| Cl | -0.38040000 | 4.60650000  | -1.45820000 |
| Cl | -3.05760000 | 2.08000000  | -0.93610000 |
| Cl | -1.23170000 | 3.46970000  | 2.00460000  |

|   |             |            |            |
|---|-------------|------------|------------|
| H | -0.23250000 | 0.32740000 | 2.32040000 |
| H | 1.75370000  | 1.78460000 | 1.94140000 |
| H | 1.78640000  | 0.01350000 | 3.60580000 |

## Int26

|    |             |             |             |
|----|-------------|-------------|-------------|
| C  | -3.09970000 | 0.39010000  | -1.29650000 |
| C  | -2.95090000 | -0.20370000 | 0.01660000  |
| C  | -3.50230000 | -1.40060000 | 0.39570000  |
| C  | -2.27850000 | 1.70310000  | -1.51980000 |
| O  | -4.29540000 | -2.08890000 | -0.41090000 |
| O  | -3.77700000 | -0.05060000 | -2.21730000 |
| C  | -1.03270000 | 1.39130000  | -2.30850000 |
| C  | 0.21850000  | 1.27300000  | -1.78860000 |
| C  | 0.68030000  | 1.51570000  | -0.42660000 |
| O  | 1.50900000  | 0.72720000  | 0.09660000  |
| C  | -4.77180000 | -3.38080000 | -0.00140000 |
| Cl | 2.93580000  | -0.86020000 | 2.11630000  |
| H  | -2.32980000 | 0.30980000  | 0.74100000  |
| H  | -5.36830000 | -3.73250000 | -0.84280000 |
| H  | -3.93850000 | -4.06400000 | 0.18290000  |
| H  | -5.39090000 | -3.30400000 | 0.89620000  |
| H  | -2.05560000 | 2.17030000  | -0.56120000 |
| H  | -2.92540000 | 2.37120000  | -2.09870000 |
| H  | 0.98940000  | 0.83690000  | -2.42050000 |
| C  | 0.30960000  | 2.70850000  | 0.36970000  |

|    |             |             |             |
|----|-------------|-------------|-------------|
| C  | -0.10890000 | 3.90090000  | -0.24690000 |
| C  | 0.46510000  | 2.67010000  | 1.76770000  |
| C  | -0.38650000 | 5.02680000  | 0.52380000  |
| H  | -0.19070000 | 3.94450000  | -1.32780000 |
| C  | 0.17110000  | 3.79320000  | 2.53400000  |
| H  | 0.81820000  | 1.75580000  | 2.23330000  |
| C  | -0.25470000 | 4.97210000  | 1.91380000  |
| H  | -0.69720000 | 5.94870000  | 0.04120000  |
| H  | 0.28180000  | 3.75520000  | 3.61380000  |
| H  | -0.47430000 | 5.85110000  | 2.51350000  |
| C  | -1.26880000 | 1.06190000  | -3.75640000 |
| H  | -1.61630000 | 1.96030000  | -4.28550000 |
| H  | -0.36700000 | 0.69260000  | -4.25130000 |
| H  | -2.07410000 | 0.32410000  | -3.84720000 |
| Cl | 0.67740000  | -2.00920000 | -0.69040000 |
| Cl | 3.82010000  | 0.13400000  | -1.55210000 |
| Cl | 3.82430000  | -2.91320000 | -0.33060000 |
| Ti | 2.60810000  | -1.05770000 | -0.08370000 |
| O  | -3.30470000 | -1.96740000 | 1.59490000  |
| Si | -2.25850000 | -1.49090000 | 2.84730000  |
| H  | -2.44090000 | -2.54230000 | 3.86880000  |
| H  | -0.86730000 | -1.43140000 | 2.35270000  |
| H  | -2.68420000 | -0.16910000 | 3.37050000  |

|    |             |             |             |
|----|-------------|-------------|-------------|
| C  | -0.05780000 | 2.26950000  | 1.03300000  |
| C  | -0.44010000 | 0.86840000  | 0.98260000  |
| C  | 0.16080000  | -0.16820000 | 1.66270000  |
| C  | -0.47870000 | 3.07790000  | -0.21350000 |
| O  | 0.93340000  | 0.03750000  | 2.72290000  |
| O  | 0.58250000  | 2.81240000  | 1.92370000  |
| C  | -0.44190000 | 2.39820000  | -1.57310000 |
| C  | 0.28230000  | 1.30920000  | -1.90690000 |
| C  | 1.25740000  | 0.52930000  | -1.10420000 |
| O  | 1.12290000  | -0.72720000 | -1.02040000 |
| C  | 1.60280000  | -1.08790000 | 3.31750000  |
| Cl | 1.68820000  | -3.64410000 | -0.96560000 |
| H  | -1.11360000 | 0.55630000  | 0.19630000  |
| H  | 2.15160000  | -0.67000000 | 4.16110000  |
| H  | 0.87830000  | -1.82920000 | 3.66380000  |
| H  | 2.29460000  | -1.55480000 | 2.61150000  |
| H  | 0.13820000  | 3.98550000  | -0.22150000 |
| H  | -1.50970000 | 3.42370000  | -0.04610000 |
| H  | 0.10880000  | 0.85690000  | -2.88240000 |
| C  | 2.51520000  | 1.12280000  | -0.61790000 |
| C  | 2.85580000  | 2.45920000  | -0.89440000 |
| C  | 3.41680000  | 0.31870000  | 0.10830000  |
| C  | 4.06020000  | 2.98490000  | -0.43630000 |
| H  | 2.18460000  | 3.07260000  | -1.48380000 |

|    |             |             |             |
|----|-------------|-------------|-------------|
| C  | 4.61830000  | 0.84700000  | 0.56030000  |
| H  | 3.16210000  | -0.71860000 | 0.29480000  |
| C  | 4.93990000  | 2.18270000  | 0.29290000  |
| H  | 4.31550000  | 4.01780000  | -0.65260000 |
| H  | 5.30940000  | 0.22220000  | 1.11840000  |
| H  | 5.88050000  | 2.59450000  | 0.64810000  |
| C  | -1.37320000 | 3.00510000  | -2.59330000 |
| H  | -1.17750000 | 4.08030000  | -2.70090000 |
| H  | -1.27430000 | 2.53560000  | -3.57590000 |
| H  | -2.41600000 | 2.90840000  | -2.26400000 |
| Cl | -4.58030000 | 2.40800000  | 0.17670000  |
| Cl | -1.47340000 | -1.82240000 | -2.03800000 |
| Cl | -1.29690000 | -3.92670000 | 0.50490000  |
| Ti | -0.01770000 | -2.31960000 | -0.40960000 |
| O  | 0.04290000  | -1.40760000 | 1.23130000  |
| Si | -4.77070000 | 0.53540000  | 1.08550000  |
| H  | -3.91440000 | -0.42140000 | 0.35290000  |
| H  | -4.34240000 | 0.66410000  | 2.49640000  |
| H  | -6.19490000 | 0.13730000  | 1.00620000  |

### **Int27'**

|   |            |             |            |
|---|------------|-------------|------------|
| C | 2.23940000 | 1.14140000  | 1.47210000 |
| C | 0.85240000 | 0.66720000  | 1.03280000 |
| C | 0.20500000 | -0.53440000 | 1.68220000 |

|    |             |             |             |
|----|-------------|-------------|-------------|
| C  | 2.61760000  | 2.47380000  | 0.83570000  |
| O  | -0.96210000 | -0.83450000 | 1.40260000  |
| O  | 0.92110000  | -1.23050000 | 2.53070000  |
| O  | 2.96510000  | 0.56350000  | 2.24830000  |
| C  | 2.13680000  | 2.64270000  | -0.59180000 |
| C  | 1.33970000  | 1.74670000  | -1.18700000 |
| H  | 1.03240000  | 1.87730000  | -2.22160000 |
| C  | 0.79450000  | 0.49440000  | -0.53660000 |
| O  | -0.58220000 | 0.40090000  | -0.89050000 |
| Ti | -2.20420000 | 0.14870000  | -0.22500000 |
| C  | 0.28730000  | -2.39330000 | 3.12130000  |
| Cl | -3.06760000 | -1.91470000 | -0.38380000 |
| Cl | -3.40250000 | 1.11920000  | -1.84050000 |
| H  | -0.60250000 | -2.09170000 | 3.67710000  |
| H  | 0.01220000  | -3.10150000 | 2.33770000  |
| H  | 1.04220000  | -2.81270000 | 3.78400000  |
| H  | 3.70710000  | 2.58030000  | 0.90370000  |
| H  | 2.19890000  | 3.27730000  | 1.46440000  |
| Cl | -2.78430000 | 1.52490000  | 1.45600000  |
| H  | 0.17020000  | 1.50640000  | 1.23120000  |
| C  | 2.63240000  | 3.87170000  | -1.30730000 |
| H  | 3.72930000  | 3.88330000  | -1.35840000 |
| H  | 2.24060000  | 3.93070000  | -2.32660000 |
| H  | 2.33230000  | 4.78230000  | -0.77160000 |
| C  | 1.53350000  | -0.77280000 | -1.00650000 |

|   |             |             |             |
|---|-------------|-------------|-------------|
| C | 2.93310000  | -0.77520000 | -1.09310000 |
| C | 0.83630000  | -1.94460000 | -1.32610000 |
| C | 3.62040000  | -1.92660000 | -1.47440000 |
| H | 3.49360000  | 0.12860000  | -0.87750000 |
| C | 1.52660000  | -3.09470000 | -1.71440000 |
| H | -0.24560000 | -1.96460000 | -1.28560000 |
| C | 2.91890000  | -3.09200000 | -1.78690000 |
| H | 4.70500000  | -1.90760000 | -1.53420000 |
| H | 0.96680000  | -3.99120000 | -1.96610000 |
| H | 3.45380000  | -3.98750000 | -2.09110000 |

### **Ts16**

|    |             |             |             |
|----|-------------|-------------|-------------|
| C  | 0.17390000  | 2.04020000  | 1.31650000  |
| C  | 0.06460000  | 0.61120000  | 1.55190000  |
| C  | 1.17470000  | -0.27120000 | 1.90400000  |
| C  | 1.28050000  | 2.55790000  | 0.34440000  |
| O  | 1.06420000  | -1.44310000 | 2.23230000  |
| O  | 2.40290000  | 0.34150000  | 1.87850000  |
| O  | -0.66640000 | 2.85700000  | 1.68620000  |
| C  | 0.58150000  | 2.67170000  | -0.98090000 |
| C  | 0.13100000  | 1.57170000  | -1.63940000 |
| H  | -0.60050000 | 1.69540000  | -2.43750000 |
| C  | 0.35190000  | 0.18240000  | -1.27260000 |
| O  | -0.70330000 | -0.60710000 | -1.35860000 |
| Ti | -2.10960000 | -0.64340000 | -0.14130000 |



|    |             |             |             |
|----|-------------|-------------|-------------|
| C  | 3.49660000  | -0.46730000 | 2.33080000  |
| Cl | -2.02650000 | -2.21590000 | 1.38020000  |
| Cl | -3.60320000 | -1.47390000 | -1.55170000 |
| H  | 3.31720000  | -0.82020000 | 3.34980000  |
| H  | 3.64310000  | -1.33170000 | 1.67870000  |
| H  | 4.37170000  | 0.18430000  | 2.30190000  |
| H  | 2.12520000  | 1.87230000  | 0.32830000  |
| H  | 1.61290000  | 3.53770000  | 0.69500000  |
| Cl | -3.12870000 | 1.19540000  | 0.48130000  |
| H  | -0.83510000 | 0.34470000  | 2.10200000  |
| C  | 1.64950000  | -0.48370000 | -1.23450000 |
| C  | 2.80940000  | 0.18170000  | -1.68700000 |
| C  | 1.73550000  | -1.84300000 | -0.86250000 |
| C  | 4.02050000  | -0.49400000 | -1.76110000 |
| H  | 2.73950000  | 1.21350000  | -2.01260000 |
| C  | 2.95100000  | -2.51210000 | -0.94430000 |
| H  | 0.85460000  | -2.35900000 | -0.50230000 |
| C  | 4.09350000  | -1.84180000 | -1.39200000 |
| H  | 4.90520000  | 0.02150000  | -2.12280000 |
| H  | 3.00850000  | -3.55670000 | -0.65440000 |
| H  | 5.04000000  | -2.37100000 | -1.46030000 |
| C  | 0.17240000  | 4.04800000  | -1.41200000 |
| H  | 1.05590000  | 4.68350000  | -1.55700000 |
| H  | -0.41660000 | 4.04560000  | -2.33340000 |
| H  | -0.41820000 | 4.50340000  | -0.60650000 |

**Int28**

|    |             |             |             |
|----|-------------|-------------|-------------|
| C  | -1.87930000 | 2.20170000  | 0.46200000  |
| C  | -2.24570000 | 0.80880000  | 0.74020000  |
| C  | -1.72420000 | -0.00840000 | 1.79530000  |
| C  | -0.45760000 | 2.67920000  | 0.84500000  |
| O  | -1.67620000 | -1.26050000 | 1.57900000  |
| O  | -1.20620000 | 0.50970000  | 2.89640000  |
| O  | -2.62340000 | 2.95730000  | -0.14560000 |
| C  | 0.40260000  | 2.82610000  | -0.38670000 |
| C  | 1.29670000  | 1.89300000  | -0.79620000 |
| H  | 1.94930000  | 2.13940000  | -1.62930000 |
| Ti | -1.38700000 | -1.02880000 | -0.45900000 |
| C  | -0.49590000 | -0.39770000 | 3.77670000  |
| Cl | -3.40260000 | -1.86020000 | -0.92270000 |
| Cl | -0.19710000 | -2.94120000 | -0.62590000 |
| H  | -1.18200000 | -1.14780000 | 4.17380000  |
| H  | 0.31460000  | -0.88580000 | 3.23190000  |
| H  | -0.10850000 | 0.23290000  | 4.57590000  |
| H  | -0.00260000 | 2.00460000  | 1.56700000  |
| H  | -0.57770000 | 3.66250000  | 1.31320000  |
| Cl | -1.11330000 | 0.09480000  | -2.37670000 |
| C  | 2.86930000  | 0.02380000  | -0.11140000 |
| C  | 4.00080000  | 0.84330000  | -0.28550000 |
| C  | 3.04670000  | -1.34230000 | 0.17790000  |
| C  | 5.28010000  | 0.30600000  | -0.18120000 |

|   |             |             |             |
|---|-------------|-------------|-------------|
| H | 3.87840000  | 1.90360000  | -0.48120000 |
| C | 4.32790000  | -1.87580000 | 0.27230000  |
| H | 2.17300000  | -1.97140000 | 0.30500000  |
| C | 5.44500000  | -1.05450000 | 0.09350000  |
| H | 6.14810000  | 0.94590000  | -0.31110000 |
| H | 4.45740000  | -2.93360000 | 0.48180000  |
| H | 6.44450000  | -1.47390000 | 0.16950000  |
| C | 0.23590000  | 4.11550000  | -1.13490000 |
| H | 0.52880000  | 4.96950000  | -0.50910000 |
| H | 0.81380000  | 4.14020000  | -2.06260000 |
| H | -0.82920000 | 4.24820000  | -1.36410000 |
| C | 1.49850000  | 0.57320000  | -0.20000000 |
| O | 0.54050000  | -0.11690000 | 0.23730000  |
| H | -3.25420000 | 0.54250000  | 0.42900000  |

**TS17**

|    |             |             |             |
|----|-------------|-------------|-------------|
| C  | 1.87620000  | 2.31500000  | -0.23110000 |
| O  | 2.21450000  | 1.21190000  | 0.37250000  |
| Ti | 2.55770000  | -0.65080000 | -0.11160000 |
| Cl | 2.62450000  | -2.94090000 | -0.44780000 |
| Cl | 2.67470000  | -0.98280000 | 2.13620000  |
| O  | 1.13250000  | -0.52180000 | -1.27770000 |
| C  | -0.19850000 | -0.54930000 | -1.30060000 |
| C  | -0.78330000 | -1.68530000 | -0.64390000 |
| H  | -0.07480000 | -2.34250000 | -0.15870000 |

|    |             |             |             |
|----|-------------|-------------|-------------|
| C  | -2.09330000 | -2.07140000 | -0.64550000 |
| O  | -3.06990000 | -1.41030000 | -1.26580000 |
| Si | -4.69590000 | -1.93080000 | -1.33460000 |
| Cl | 4.47240000  | -0.19100000 | -1.17950000 |
| H  | -5.33230000 | -0.86470000 | -2.13790000 |
| H  | -4.80400000 | -3.23910000 | -2.01860000 |
| H  | -5.29260000 | -1.98420000 | 0.02000000  |
| O  | -2.56400000 | -3.17300000 | -0.04160000 |
| C  | -0.85330000 | 0.53470000  | -1.87700000 |
| H  | -0.28850000 | 1.16230000  | -2.55280000 |
| H  | -1.92480000 | 0.49610000  | -2.01090000 |
| C  | -1.66670000 | -4.02970000 | 0.68630000  |
| H  | -1.20100000 | -3.47950000 | 1.50890000  |
| H  | -2.29090000 | -4.83410000 | 1.07390000  |
| H  | -0.89780000 | -4.43270000 | 0.02090000  |
| C  | 0.58580000  | 2.71850000  | -0.53830000 |
| C  | -0.71540000 | 2.15730000  | -0.30040000 |
| H  | 0.54260000  | 3.60580000  | -1.16220000 |
| O  | -1.72310000 | 2.88120000  | -0.90130000 |
| Si | -2.22120000 | 4.44000000  | -0.50340000 |
| H  | -1.22690000 | 5.44880000  | -0.95040000 |
| H  | -3.49170000 | 4.62140000  | -1.24040000 |
| H  | -2.42880000 | 4.56940000  | 0.96040000  |
| C  | 3.03550000  | 3.21810000  | -0.57580000 |
| H  | 3.73980000  | 2.67850000  | -1.21860000 |

|   |             |             |             |
|---|-------------|-------------|-------------|
| H | 2.71920000  | 4.13990000  | -1.06920000 |
| H | 3.57740000  | 3.46950000  | 0.34350000  |
| C | -1.18010000 | 1.43610000  | 0.91740000  |
| C | -2.53820000 | 1.07260000  | 1.01670000  |
| C | -0.33550000 | 1.17440000  | 2.00760000  |
| C | -3.03250000 | 0.46840000  | 2.16760000  |
| H | -3.20030000 | 1.26760000  | 0.18050000  |
| C | -0.83550000 | 0.56330000  | 3.15880000  |
| H | 0.71000000  | 1.44500000  | 1.96830000  |
| C | -2.18070000 | 0.20970000  | 3.24630000  |
| H | -4.08460000 | 0.20220000  | 2.22620000  |
| H | -0.16100000 | 0.36960000  | 3.98740000  |
| H | -2.56610000 | -0.26130000 | 4.14660000  |

### **Int29**

|    |             |             |             |
|----|-------------|-------------|-------------|
| C  | 1.61380000  | 0.50100000  | -2.13950000 |
| O  | 2.27390000  | 0.01380000  | -1.05310000 |
| Ti | 2.19790000  | -1.40660000 | 0.02940000  |
| Cl | 2.00740000  | -1.25160000 | 2.28090000  |
| Cl | 4.40920000  | -1.82070000 | 0.06060000  |
| O  | 0.14220000  | -0.99310000 | 0.05960000  |
| C  | -1.05760000 | -0.66910000 | -0.04310000 |
| C  | -2.03970000 | -1.65490000 | 0.32470000  |
| H  | -1.61350000 | -2.58910000 | 0.66530000  |
| C  | -3.40280000 | -1.54290000 | 0.27870000  |

|    |             |             |             |
|----|-------------|-------------|-------------|
| O  | -4.04120000 | -0.45580000 | -0.13580000 |
| Si | -5.74620000 | -0.27790000 | -0.21470000 |
| Cl | 1.61930000  | -3.30260000 | -1.05050000 |
| H  | -5.89410000 | 1.09490000  | -0.73810000 |
| H  | -6.32120000 | -1.27100000 | -1.14920000 |
| H  | -6.33720000 | -0.40160000 | 1.13650000  |
| O  | -4.26110000 | -2.50470000 | 0.64040000  |
| C  | -1.44000000 | 0.71390000  | -0.53090000 |
| C  | -3.77130000 | -3.76430000 | 1.13140000  |
| H  | -3.17670000 | -3.61400000 | 2.03690000  |
| H  | -4.66240000 | -4.34850000 | 1.35810000  |
| H  | -3.17500000 | -4.26620000 | 0.36420000  |
| C  | 0.49950000  | 1.24630000  | -2.06020000 |
| H  | 0.07040000  | 1.57450000  | -3.00200000 |
| O  | -1.01220000 | 2.88410000  | -1.38430000 |
| Si | -1.70980000 | 4.13690000  | -0.53370000 |
| H  | -0.73170000 | 5.05280000  | 0.10570000  |
| H  | -2.48230000 | 4.88400000  | -1.55720000 |
| H  | -2.65440000 | 3.65370000  | 0.51650000  |
| C  | 2.28060000  | 0.13340000  | -3.43840000 |
| H  | 2.31260000  | -0.95630000 | -3.55750000 |
| H  | 1.75330000  | 0.56730000  | -4.29180000 |
| H  | 3.31730000  | 0.49000000  | -3.44310000 |
| C  | 0.54000000  | 2.17000000  | 0.33730000  |
| C  | 0.16590000  | 1.92700000  | 1.66390000  |

|   |             |            |             |
|---|-------------|------------|-------------|
| C | 1.67210000  | 2.96680000 | 0.10010000  |
| C | 0.90470000  | 2.45650000 | 2.72520000  |
| H | -0.69690000 | 1.31050000 | 1.89350000  |
| C | 2.41000000  | 3.49470000 | 1.15550000  |
| H | 1.97120000  | 3.16890000 | -0.92360000 |
| C | 2.02810000  | 3.24100000 | 2.47550000  |
| H | 0.60350000  | 2.24120000 | 3.74630000  |
| H | 3.28600000  | 4.10310000 | 0.94780000  |
| H | 2.60620000  | 3.64770000 | 3.30060000  |
| C | -0.30390000 | 1.72110000 | -0.86040000 |
| H | -2.03040000 | 0.59590000 | -1.44720000 |
| H | -2.13660000 | 1.15770000 | 0.18890000  |

**Int29'**

|   |             |             |             |
|---|-------------|-------------|-------------|
| C | -0.58490000 | 1.02430000  | -0.96740000 |
| C | -0.97530000 | 2.37760000  | -0.94180000 |
| C | -2.15810000 | 2.88280000  | -0.41050000 |
| C | 0.75550000  | 0.67400000  | -1.57190000 |
| O | -3.21890000 | 2.23670000  | -0.01940000 |
| O | -2.21140000 | 4.20440000  | -0.27090000 |
| O | -1.32140000 | 0.07890000  | -0.53970000 |
| C | 1.83530000  | 0.06550000  | -0.58190000 |
| C | 2.47670000  | -1.14180000 | -1.21340000 |
| C | 1.69310000  | -2.18840000 | -1.54400000 |
| C | 2.14940000  | -3.47940000 | -2.15420000 |

|    |             |             |             |
|----|-------------|-------------|-------------|
| O  | 0.36410000  | -2.10560000 | -1.32800000 |
| Ti | -0.73620000 | -1.84750000 | 0.12520000  |
| C  | -3.42150000 | 4.80580000  | 0.23000000  |
| Cl | 0.12460000  | -3.72510000 | 1.10200000  |
| H  | -0.26450000 | 3.12350000  | -1.27240000 |
| H  | -4.26770000 | 4.57240000  | -0.42070000 |
| H  | -3.63010000 | 4.46060000  | 1.24510000  |
| H  | -3.22100000 | 5.87670000  | 0.22450000  |
| H  | 3.23020000  | -3.47850000 | -2.32050000 |
| H  | 1.88670000  | -4.31400000 | -1.49490000 |
| H  | 1.64100000  | -3.64560000 | -3.11150000 |
| H  | 1.19330000  | 1.55110000  | -2.05080000 |
| H  | 0.54210000  | -0.05800000 | -2.35240000 |
| O  | 1.11720000  | -0.40570000 | 0.63250000  |
| Si | 1.96040000  | -0.62370000 | 2.12470000  |
| H  | 1.49140000  | -1.86110000 | 2.76110000  |
| H  | 3.40790000  | -0.72290000 | 1.81770000  |
| H  | 1.72100000  | 0.54420000  | 3.00310000  |
| H  | 3.54890000  | -1.21250000 | -1.33650000 |
| Cl | -1.44120000 | -1.03800000 | 2.19210000  |
| Cl | -2.64420000 | -2.69870000 | -0.69220000 |
| C  | 2.79190000  | 1.20630000  | -0.21630000 |
| C  | 2.34790000  | 2.22590000  | 0.64260000  |
| C  | 4.06190000  | 1.33300000  | -0.79350000 |
| C  | 3.16360000  | 3.31590000  | 0.94320000  |



|    |             |             |             |
|----|-------------|-------------|-------------|
| H  | 1.35690000  | 2.16530000  | 1.08010000  |
| C  | 4.87650000  | 2.42780000  | -0.49700000 |
| H  | 4.42690000  | 0.58760000  | -1.49100000 |
| C  | 4.43520000  | 3.42000000  | 0.37720000  |
| H  | 2.80140000  | 4.08520000  | 1.61960000  |
| H  | 5.86020000  | 2.49960000  | -0.95290000 |
| H  | 5.07240000  | 4.26830000  | 0.61090000  |
| Si | -4.02310000 | 0.75880000  | -0.44600000 |
| H  | -3.82860000 | -0.22200000 | 0.62300000  |
| H  | -5.42980000 | 1.24020000  | -0.45050000 |
| H  | -3.65010000 | 0.37990000  | -1.82090000 |

### **TS18**

|   |             |             |             |
|---|-------------|-------------|-------------|
| C | -0.86140000 | 0.89060000  | -0.95840000 |
| C | -1.59960000 | 2.09350000  | -0.98590000 |
| C | -2.86700000 | 2.28680000  | -0.44450000 |
| C | 0.49280000  | 0.88250000  | -1.65530000 |
| O | -3.70100000 | 1.39920000  | 0.01320000  |
| O | -3.27790000 | 3.55040000  | -0.37170000 |
| O | -1.30780000 | -0.18400000 | -0.46410000 |
| C | 1.80360000  | 0.58040000  | -0.88720000 |
| C | 2.61680000  | -0.45650000 | -1.44810000 |
| C | 2.05020000  | -1.67720000 | -1.74290000 |
| C | 2.81200000  | -2.83430000 | -2.31890000 |
| O | 0.79010000  | -1.89530000 | -1.46860000 |

|    |             |             |             |
|----|-------------|-------------|-------------|
| Ti | -0.16110000 | -1.86760000 | 0.23030000  |
| C  | -4.60250000 | 3.82450000  | 0.12580000  |
| Cl | 1.18150000  | -3.52420000 | 1.02950000  |
| H  | -1.12890000 | 2.98350000  | -1.38260000 |
| H  | -5.35760000 | 3.33320000  | -0.49260000 |
| H  | -4.70050000 | 3.49160000  | 1.16140000  |
| H  | -4.70390000 | 4.90740000  | 0.06140000  |
| H  | 3.84540000  | -2.56640000 | -2.55430000 |
| H  | 2.80170000  | -3.66460000 | -1.60340000 |
| H  | 2.31240000  | -3.18580000 | -3.22890000 |
| H  | 0.64810000  | 1.85240000  | -2.13520000 |
| H  | 0.38440000  | 0.14000000  | -2.44850000 |
| O  | 1.10940000  | -0.32530000 | 0.66000000  |
| Si | 1.90050000  | -0.09940000 | 2.14580000  |
| H  | 1.86660000  | -1.32690000 | 2.96210000  |
| H  | 3.32110000  | 0.23610000  | 1.86080000  |
| H  | 1.29040000  | 1.03050000  | 2.89240000  |
| H  | 3.69500000  | -0.37120000 | -1.46900000 |
| Cl | -1.16790000 | -1.45810000 | 2.27770000  |
| Cl | -1.84060000 | -3.16150000 | -0.61860000 |
| C  | 2.45960000  | 1.81530000  | -0.34470000 |
| C  | 1.69820000  | 2.75040000  | 0.38060000  |
| C  | 3.81330000  | 2.10650000  | -0.58080000 |
| C  | 2.27250000  | 3.92210000  | 0.86620000  |
| H  | 0.65310000  | 2.54680000  | 0.58720000  |

|    |             |             |             |
|----|-------------|-------------|-------------|
| C  | 4.38440000  | 3.28680000  | -0.10670000 |
| H  | 4.43100000  | 1.42720000  | -1.15580000 |
| C  | 3.61960000  | 4.19670000  | 0.62290000  |
| H  | 1.66630000  | 4.61960000  | 1.43720000  |
| H  | 5.43180000  | 3.49190000  | -0.30900000 |
| H  | 4.06820000  | 5.11260000  | 0.99720000  |
| Si | -4.08290000 | -0.26130000 | -0.34240000 |
| H  | -3.61250000 | -1.10370000 | 0.75740000  |
| H  | -5.56770000 | -0.17340000 | -0.32610000 |
| H  | -3.64530000 | -0.56710000 | -1.71580000 |

### **Int30**

|    |             |             |             |
|----|-------------|-------------|-------------|
| C  | 0.48960000  | 1.05200000  | -0.81920000 |
| C  | 1.08490000  | 2.34220000  | -0.76090000 |
| C  | 0.51890000  | 3.48510000  | -0.21610000 |
| C  | 1.27990000  | -0.01660000 | -1.59890000 |
| O  | -0.73360000 | 3.68460000  | 0.10210000  |
| O  | 1.34570000  | 4.50520000  | 0.01030000  |
| O  | -0.63680000 | 0.78720000  | -0.33410000 |
| C  | 1.99040000  | -1.13550000 | -0.84810000 |
| C  | 1.49560000  | -2.39720000 | -0.75110000 |
| C  | 0.18380000  | -2.83230000 | -1.20810000 |
| C  | -0.04750000 | -4.28940000 | -1.51030000 |
| O  | -0.77000000 | -2.04220000 | -1.33520000 |
| Ti | -1.92720000 | -0.92720000 | 0.17070000  |

|    |             |             |             |
|----|-------------|-------------|-------------|
| C  | 0.79480000  | 5.75750000  | 0.46240000  |
| Cl | -3.11340000 | -2.84580000 | 0.44750000  |
| H  | 2.10800000  | 2.45160000  | -1.09630000 |
| H  | 0.07290000  | 6.14780000  | -0.25940000 |
| H  | 0.31440000  | 5.63740000  | 1.43580000  |
| H  | 1.65180000  | 6.42600000  | 0.53990000  |
| H  | 0.87370000  | -4.87620000 | -1.53790000 |
| H  | -0.71570000 | -4.68800000 | -0.73490000 |
| H  | -0.58280000 | -4.37970000 | -2.46030000 |
| H  | 2.03750000  | 0.50300000  | -2.19290000 |
| H  | 0.54770000  | -0.45590000 | -2.28110000 |
| O  | -0.57010000 | -1.35550000 | 1.29270000  |
| Si | -0.03120000 | -1.40880000 | 2.86080000  |
| H  | -1.08130000 | -1.90200000 | 3.78660000  |
| H  | 1.13720000  | -2.33260000 | 2.92900000  |
| H  | 0.42390000  | -0.06050000 | 3.29930000  |
| H  | 2.12660000  | -3.16920000 | -0.31890000 |
| Cl | -3.05150000 | 0.30420000  | 1.71180000  |
| Cl | -3.10570000 | -0.15630000 | -1.69550000 |
| C  | 3.36590000  | -0.87430000 | -0.34990000 |
| C  | 3.65640000  | 0.26970000  | 0.41480000  |
| C  | 4.40740000  | -1.78080000 | -0.61920000 |
| C  | 4.94120000  | 0.48440000  | 0.91140000  |
| H  | 2.86850000  | 0.97580000  | 0.65310000  |
| C  | 5.69460000  | -1.55400000 | -0.13650000 |

|    |             |             |             |
|----|-------------|-------------|-------------|
| H  | 4.21060000  | -2.65210000 | -1.23690000 |
| C  | 5.96550000  | -0.42260000 | 0.63490000  |
| H  | 5.13970000  | 1.36290000  | 1.51900000  |
| H  | 6.48710000  | -2.26040000 | -0.36750000 |
| H  | 6.96790000  | -0.24780000 | 1.01540000  |
| Si | -2.18430000 | 3.31530000  | -0.77980000 |
| H  | -3.04670000 | 2.50110000  | 0.07680000  |
| H  | -2.76450000 | 4.67010000  | -0.98100000 |
| H  | -1.77420000 | 2.75780000  | -2.08070000 |

## 12

|    |             |             |             |
|----|-------------|-------------|-------------|
| C  | -0.27220000 | 0.80770000  | 0.36430000  |
| C  | -1.68000000 | 0.79620000  | 0.40300000  |
| H  | -2.15650000 | 1.74940000  | 0.58710000  |
| C  | -2.50570000 | -0.28750000 | 0.12170000  |
| C  | 0.37890000  | 2.17830000  | 0.66040000  |
| O  | -2.08340000 | -1.53570000 | 0.05030000  |
| O  | 0.48290000  | -0.15810000 | 0.09830000  |
| Si | -0.97930000 | -2.50090000 | 0.94810000  |
| H  | -1.82380000 | -3.66080000 | 1.32650000  |
| H  | 0.11210000  | -2.93440000 | 0.06490000  |
| H  | -0.56400000 | -1.76070000 | 2.15540000  |
| C  | -3.94660000 | -0.11960000 | -0.13110000 |
| C  | -4.49200000 | 1.12430000  | -0.50440000 |

|    |             |             |             |
|----|-------------|-------------|-------------|
| C  | -4.80270000 | -1.23060000 | -0.00850000 |
| C  | -5.85820000 | 1.25360000  | -0.72940000 |
| H  | -3.84580000 | 1.98260000  | -0.65440000 |
| C  | -6.16920000 | -1.09430000 | -0.22890000 |
| H  | -4.38680000 | -2.19290000 | 0.26720000  |
| C  | -6.70040000 | 0.14730000  | -0.58730000 |
| H  | -6.26580000 | 2.21520000  | -1.02630000 |
| H  | -6.82090000 | -1.95630000 | -0.12230000 |
| H  | -7.76720000 | 0.25150000  | -0.76350000 |
| Ti | 2.58900000  | -0.30960000 | -0.28900000 |
| Cl | 4.60620000  | 0.59600000  | -0.33660000 |
| Cl | 1.91560000  | 0.63720000  | -2.25140000 |
| Cl | 2.88000000  | -2.38450000 | -0.94900000 |
| Cl | 2.57970000  | -0.60740000 | 1.97620000  |
| F  | 0.09390000  | 2.56240000  | 1.91400000  |
| F  | -0.07360000 | 3.11890000  | -0.18090000 |
| F  | 1.72180000  | 2.11050000  | 0.53730000  |

**TS2**

|    |             |             |             |
|----|-------------|-------------|-------------|
| C  | -0.67960000 | 0.33270000  | 0.00050000  |
| C  | 0.39830000  | -0.55540000 | -0.22130000 |
| H  | 0.23670000  | -1.59320000 | -0.46530000 |
| C  | 1.67950000  | -0.10640000 | 0.02640000  |
| O  | 2.02010000  | 1.09830000  | 0.31230000  |
| O  | -0.47280000 | 1.57780000  | 0.24980000  |
| C  | -2.09010000 | -0.11090000 | 0.00300000  |
| C  | -2.44990000 | -1.46920000 | -0.05870000 |
| C  | -3.10390000 | 0.86190000  | 0.07220000  |
| C  | -3.79070000 | -1.84250000 | -0.05660000 |
| H  | -1.68860000 | -2.24100000 | -0.09220000 |
| C  | -4.44280000 | 0.48460000  | 0.07150000  |
| H  | -2.82090000 | 1.90720000  | 0.12140000  |
| C  | -4.78940000 | -0.86750000 | 0.00640000  |
| H  | -4.05700000 | -2.89450000 | -0.10040000 |
| H  | -5.21740000 | 1.24430000  | 0.12050000  |
| H  | -5.83540000 | -1.16180000 | 0.00650000  |
| Si | 1.05070000  | 2.65460000  | -0.17650000 |
| H  | 2.30520000  | 3.33530000  | 0.27310000  |
| H  | 1.07940000  | 2.47250000  | -1.65160000 |
| H  | 0.08070000  | 3.75220000  | 0.14450000  |
| C  | 2.86090000  | -1.08030000 | 0.01810000  |
| F  | 2.47160000  | -2.33840000 | -0.27540000 |
| F  | 3.45660000  | -1.09950000 | 1.22120000  |

F 3.76910000 -0.70390000 -0.89600000

**12'**

C 0.93730000 0.95090000 0.23810000

C 2.29850000 0.59270000 -0.16760000

H 2.93820000 1.35980000 -0.57970000

C 2.83640000 -0.64450000 -0.06610000

O 2.31260000 -1.74760000 0.45640000

O 0.13250000 0.08840000 0.63040000

Si 1.52170000 -2.00120000 1.94550000

H 2.28100000 -3.13450000 2.53090000

H 1.69580000 -0.80810000 2.80490000

H 0.12060000 -2.41020000 1.75930000

Ti -2.57120000 -0.86470000 -0.27340000

Cl -2.70710000 -0.74720000 1.91180000

Cl -1.15990000 -2.32690000 -1.07660000

Cl -2.48490000 1.06440000 -1.29840000

Cl -4.52130000 -1.66590000 -0.85350000

C 0.54500000 2.38980000 0.20560000

C -0.48530000 2.81100000 1.06360000

C 1.16430000 3.33350000 -0.63120000

C -0.87710000 4.14550000 1.09440000

H -0.95900000 2.07880000 1.70900000

C 0.75580000 4.66560000 -0.61360000



|   |             |             |             |
|---|-------------|-------------|-------------|
| H | 1.94260000  | 3.03030000  | -1.32410000 |
| C | -0.25920000 | 5.07530000  | 0.25350000  |
| H | -1.66540000 | 4.46200000  | 1.77140000  |
| H | 1.22990000  | 5.38340000  | -1.27680000 |
| H | -0.56890000 | 6.11660000  | 0.27300000  |
| C | 4.24260000  | -0.92490000 | -0.58350000 |
| F | 5.03270000  | -1.33630000 | 0.42860000  |
| F | 4.21860000  | -1.89810000 | -1.50920000 |
| F | 4.81330000  | 0.16250000  | -1.13710000 |
